# Capturing the songs of mice with an improved detection and classification method for ultrasonic vocalizations (*BootSnap*)

Reyhaneh Abbasi<sup>\*1,2,3</sup>, Peter Balazs<sup>1</sup>, Maria Adelaide Marconi<sup>2</sup>, Doris Nicolakis<sup>2</sup>, Sarah M. Zala<sup>2</sup>, and Dustin J. Penn<sup>2</sup>

<sup>1</sup> Acoustic Research Institute, Austrian Academy of Science, Vienna, Austria

<sup>2</sup> Konrad Lorenz Institute of Ethology, Department of Interdisciplinary Life Sciences, University of Veterinary Medicine, Vienna, Austria

<sup>3</sup> Vienna Doctoral School of Cognition, Behaviour and Neuroscience, University of Vienna, Vienna, Austria

\*Corresponding author: reyhaneh.abbasi@oeaw.ac.at

## Abstract

House mice communicate through ultrasonic vocalizations (USVs), which are above the range of human hearing (>20 kHz), and several automated methods have been developed for USV detection and classification. Here we evaluate their advantages and disadvantages in a full, systematic comparison. We compared the performance of four detection methods, DeepSqueak (DSQ), MUPET, USVSEG, and the Automatic Mouse Ultrasound Detector (A-MUD). Moreover, we compared these to human-based manual detection (considered as ground truth), and evaluated the inter-observer reliability. All four methods had comparable rates of detection failure, though A-MUD outperformed the others in terms of true positive rates for recordings with low or high signal-to-noise ratios. We also did a systematic comparison of existing classification algorithms, where we found the need to develop a new method for automating the classification of USVs using supervised classification, bootstrapping on Gammatone Spectrograms, and Convolutional Neural Networks algorithms with Snapshot ensemble learning (*BootSnap*). It successfully classified calls into 12 types, including a new class of false positives used for detection refinement. *BootSnap* provides enhanced performance compared to state-of-the-art tools, it has an improved generalizability, and it is freely available for scientific use.

**Keywords:** mice ultrasonic vocalizations, supervised learning, imbalanced data, bootstrap, Convolutional Neural Networks (CNNs), Generalizability

## 1. INTRODUCTION

The ultrasonic vocalizations (USVs) of house mice (*Mus musculus*) and rats (*Rattus norvegicus*) are becoming increasingly interesting and are investigated to better understand animal communication (for reviews see (Brudzynski, 2018; Ehret, 2018; Heckman et al., 2016)) and as a model for studying the

36 genetic basis of autism and speech disorders in humans (Fischer et al., 2011; Scattoni et al., 2008). Rodent  
37 vocalizations are surprisingly complex and our focus here is on the USVs of house mice. Mice emit  
38 USVs in discrete units called *syllables* or *calls*, separated by gaps of silence, which have been classified  
39 into several different types by visually inspecting spectrograms (Brudzynski, 2018; Ehret, 2018;  
40 Heckman et al., 2016; Hoffmann et al., 2012; Marconi et al., 2020; Musolf et al., 2015; Nicolakis et al.,  
41 2020; von Merten et al., 2014) i.e., the squared modulus of the short-time Fourier transforms (STFT)  
42 (Oppenheim et al., 1999) (Fig. 2), or, less often, by statistical clustering analyses (Burkett et al., 2015;  
43 Chabout et al., 2017; Coffey et al., 2019; Dou et al., 2018; Hastie et al., 2009; Van Segbroeck et al.,  
44 2017). USVs are classified according to their shape and other spectro-temporal features, including the  
45 length of each syllable, their frequency content, and degree of complexity (frequency-jumps or  
46 harmonics). Our understanding of USVs has greatly improved in recent years; however, spectrograms  
47 are still usually analyzed manually (visual inspection), which is extremely time-consuming and better  
48 methods are needed for detecting and classifying USVs. Manually detecting each vocalization in many  
49 recordings can take an enormous amount of time, and though semi-automatic methods are useful, they  
50 are still time-consuming (e.g., semi-automatic detection using Avisoft SASLab Pro and manual checks  
51 requires 1–1.5 hours merely to detect 150-300 USVs (M. Binder et al., 2020), and some datasets contain  
52 tens of thousands of USVs (Marconi et al., 2020)). The time required to classify USVs takes even longer  
53 than detection, and classification is a necessary step to evaluate qualitative differences in vocalizations  
54 and to conduct analyses of USV sequences (syntax) (e.g., von Merten et al. (2014)).

55 Several software tools have recently become available for automating USV detection, including  
56 MUPET (Van Segbroeck et al., 2017), MSA (Chabout et al., 2017), DeepSqueak (DSQ) (Coffey et al.,  
57 2019), USVSEG (Tachibana et al., 2020), Automatic Ultrasound Detector (A-MUD) (Zala et al., 2017a),  
58 Ultravox (Noldus; Wageningen, NL) (commercial), and SONOTRACK (commercial). These tools  
59 enhance the efficiency of processing USV data, but they can generate erroneous results for several  
60 reasons. Failing to detect actual USVs (false-negative rate or FNR) can result in missing actual  
61 differences in the vocalizations of mice, and erroneous detections (false positive rate or FPR) can lead to  
62 failure to detect actual differences and generate false differences. The challenge for any USV detection  
63 algorithm is maximizing the true positive rate (TPR) while minimizing the FNR and FPR. Moreover,  
64 automatic methods can have systematic biases depending on how they are developed. For example,  
65 automated methods for detection or classification developed using only one mouse strain, one sex, one  
66 particular state, or recorded in only one context can increase both types of error (See Table 1 for the mice  
67 and recording conditions used for developing different USV detection tools if applied in other settings).

68 Thus, automated methods can greatly enhance the efficiency of processing USV data, but it is critical  
 69 that they have low and unbiased error rates. Results should be treated with caution until the error rates in  
 70 the detection and classification method are evaluated.

71 **Table 1: Types of rodents and recording contexts used in different studies.**  
 72

| Study  | Rodents <sup>1</sup>                                                                                                                                    | Sex / Age                                        | Recording context                                                       | Reference                    |
|--------|---------------------------------------------------------------------------------------------------------------------------------------------------------|--------------------------------------------------|-------------------------------------------------------------------------|------------------------------|
| USVSEG | Laboratory mice (C57BL/6J, BALB/c, Shank2), Adult female rat ( <i>Rattus norvegicus domesticus</i> ), Mongolian gerbil ( <i>Meriones unguiculatus</i> ) | Mice: adults of both sexes and pups; Female rats | Mice: opposite-sex interactions <sup>2</sup>                            | (Tachibana et al., 2020)     |
| A-MUD  | Wild-derived mice ( <i>Mus musculus musculus</i> )                                                                                                      | Adult males                                      | Male response to a female stimulus                                      | (Zala et al., 2017a)         |
| MUPET  | Laboratory mice (DBA/2 x, C57BL/6, B6D2F1, 9 F2 from DBA/2 x C57BL/6)                                                                                   | Male / adult                                     | Male response to female urine, an anesthetized female, and awake female | (Van Segbroeck et al., 2017) |
| DSQ    | Laboratory mice (B6D2F1)                                                                                                                                | Male / adult                                     | Male response to anesthetized males and female urine                    | (Coffey et al., 2019)        |

73 <sup>1</sup> USV studies are mainly conducted with domesticated, laboratory mice (*Mus laboratorious*), which are genomic  
 74 mixtures of three different *Mus musculus* subspecies, though mainly *Mus musculus domesticus*. They are  
 75 artificially bred for breeding in captivity, highly inbred, obese, and carry deleterious genes that cause neural, visual,  
 76 auditory defects (e.g., many strains show age-related hearing loss). Findings from one inbred strain often do not  
 77 generalize to other strains or to wild mice, and their behavior is very different from wild house mice.

78 <sup>2</sup> 10 recording sessions of 6 male mice (C57BL/6J or BALB/c) after introducing an adult female of the same strain  
 79 into the cage for 1 min. For Shank2- mice (a disease model), a dataset from MouseTube was used and the procedure  
 80 was similar. Mouse pups were C57BL/6J recorded at postnatal day 5–6. Adult female rats were recorded after  
 81 being stroked by the experimenter to elicit 'pleasant calls' or received air-puff stimuli to elicit distress calls. Gerbils  
 82 were recorded targeting only calls observed under conditions that appear to be mating and non-conflict contexts.  
 83  
 84

85 Only five studies to our knowledge have compared the performance of USV detection algorithms:  
 86 (1) M. Binder et al. (2020) compared MSA and Avisoft for detecting USVs emitted from different strains  
 87 of mice (C57BL/6, Fmr1-FVB.129, NS-Pten-FVB, and 129). They concluded that Avisoft outperformed  
 88 MSA for C57BL/6 and NS-Pten-FVB strains, but these two methods performed similarly for strain 129.  
 89 Thus, there are strain-specific differences between these two detection tools. (2) In another study, M. S.  
 90 Binder et al. (2018) compared the quantity of USVs detected by Avisoft to those detected by Ultravox  
 91 (2.0) and reported significant differences in USV detection and weaker than expected overall correlations  
 92 between the systems under congruent detection parameters. (3) Van Segbroeck et al. (2017) compared  
 93 MUPET and MSA for detecting USVs emitted by B6D2F1 males from MouseTube ("MouseTube,") and  
 94 found that these methods generated similar call counts and spectro-temporal measures of individual

95 syllables. (4) Coffey et al. (2019) compared MUPET, Ultravox, and DSQ for detecting USVs by  
96 analyzing the TPR and precision (the ratio of detected true USVs to false positives). For this purpose,  
97 they manipulated a recording from MouseTube in two ways to gradually degrade its quality. In the first  
98 experiment, increasing levels of Gaussian white noise were added to recordings, and DSQ outperformed  
99 MUPET and Ultravox in terms of TPR and precision in all Gaussian noise levels. In the second  
100 experiment, real noise was added to recordings, and DSQ again outperformed MUPET in terms of  
101 precision and Ultravox in terms of precision and TPR. (5) (Zala et al., 2017a) compared the performance  
102 of Avisoft and A-MUD (version 1.0) in identifying USVs of wild-derived *Mus musculus musculus*. They  
103 concluded that the latter method is superior in terms of TPR and FPR. Zala et al. (2020) have since  
104 provided an updated version of A-MUD, which overcomes previous difficulties in identifying faint and  
105 short USVs.

106 Our first aim here is to systematically compare the performance of four commonly used USV  
107 detection tools, MUPET, DSQ, A-MUD, and USVSEG, and we addressed three main questions:

108 (1) How does the performance of these detection methods compare to each other? Previous  
109 studies indicate that A-MUD outperforms Avisoft, which outperforms MSA; MSA is comparable to  
110 MUPET and DSQ outperforms MUPET and Ultravox. To our knowledge, no study has systematically  
111 compared the performance of A-MUD and DSQ, nor evaluated more than two of these methods together,  
112 except for (Coffey et al., 2019), which compared DSQ, MUPET, and Ultravox.

113 (2) How does the performance of these detection methods compare to the ground truth (i.e.,  
114 detection by trained researchers)? Evaluation of detection methods rarely include a positive control (e.g.,  
115 manual detection), though this is necessary to obtain absolute versus relative estimates of performance  
116 (e.g., see (Zala et al., 2017a)). For example, M. Binder et al. (2020), M. S. Binder et al. (2018), and Van  
117 Segbroeck et al. (2017) compared Avisoft and MSA, Ultravox and Avisoft, and MUPET and MSA only  
118 based on the number of USVs detected by each of the two methods, no comparisons were made with the  
119 ground truth. Coffey et al. (2019) used about 100 manually detected USVs as ground truth for comparing  
120 DSQ, MUPET, and Ultravox.

121 (3) How well do USV detection tools generalize and perform when using data that differs from  
122 the training set (by generalization or out-of-sample error)? To our knowledge, only one study (M. Binder  
123 et al., 2020) has tested whether USV detection methods generalize to other strains (i.e., Avisoft and  
124 MSA), and only one study has compared MSA and MUPET for different recording conditions (males  
125 vocalizing in response to female urine, an anesthetized female, and awake female) (Van Segbroeck et

126 al., 2017). Van Segbroeck et al. (2017) and Coffey et al. (2019) only used the recordings from B6D2F1  
127 and (Zala et al., 2017a) from wild-derived *Mus musculus*. Consequently, it is unclear how well current  
128 detection methods perform whenever applied to new recordings that differ from the data used to develop  
129 and evaluate the tool. This problem is well known in the machine learning community and there are  
130 particular approaches towards this “transfer learning” (Pan et al., 2009). Thus, addressing these three  
131 questions is central to evaluating the performance of USV detection methods.

132 To compare the performance of these USV detection tools, we used recordings of house mice,  
133 including both domesticated laboratory mice (*Mus laboratorius*) and wild-derived house mice (*Mus*  
134 *musculus musculus*), and we used recordings made under different social contexts and recording  
135 conditions. To evaluate the absolute performance of these models, we applied a new dataset of manually  
136 detected USVs as ground truth with a total of 3955 USVs. The FPR is problematic for existing tools  
137 when analyzing recordings with unwanted disturbing sounds (false positives (FPs)), i.e., non-USV  
138 sounds generated because of poor recording instruments, movements of the mouse (and bedding), and  
139 social interactions during recording. Low-SNR recordings usually occur when mice are recorded with  
140 bedding in their cage and especially during social interactions, as this provides a much more natural  
141 environment for the animals. False negatives are, of course, problematic as those represent data that are  
142 just purely lost for the subsequent analysis. Signal detection theory predicts that there is an inevitable  
143 trade-off between FP and FN in the detection step (Wiley, 1983). Using a refinement step, we can set the  
144 parameters of detection such that it errs on the negative rather than the positive set, as FPs can be deleted  
145 in the refinement step. To remove FPs, MUPET and DSQ, therefore, include a preliminary detection  
146 refinement step using either an unsupervised approach, which groups data based on similarity measures  
147 rather than manually labeled USVs (both approaches), or a supervised approach, which requires manually  
148 labeled USVs for training a classifier (DSQ and (Smith et al., 2017)). Our preliminary evaluation found  
149 that DSQ outperforms MUPET in the detection refinement step (using the K-means clustering (Kanungo  
150 et al., 2002)), however, its performance differs depending on the different data. Thus, we designed a  
151 method better suited to deal with the problems mentioned above and we, therefore, compared the ability  
152 of DSQ and our classifier to detect FPs, as this is a critical step for accurate USV classification.

153 Classification poses an even greater challenge than detection. First pilot approaches for a similar  
154 evaluation of classification tools made it clear to us that there is potential for improvement here.  
155 Therefore, we developed an enhanced method for automatic classification, of USV syllable types. This  
156 can be achieved through unsupervised (Chabout et al., 2017; Coffey et al., 2019; Dou et al., 2018; Hastie  
157 et al., 2009; Van Segbroeck et al., 2017) and supervised (Coffey et al., 2019) classifiers. The advantage

158 of unsupervised classification ('clustering') is that it does not require a predefined number of classes or  
159 manually labeled observations. The number of classes is based on the information contained in the dataset  
160 rather than the researchers' assessment. However, these clusters do not always match those classified by  
161 researchers and it is unclear how they are perceived by mice (see Conclusions). In contrast, supervised  
162 classification ('classification') methods require labeled data in which USVs are classified by researchers  
163 for training a classifier (machine learning), and they have higher accuracy compared to clustering  
164 approaches (Goudbeek et al., 2008; Guerra et al., 2011). To our knowledge, only a few studies have used  
165 supervised methods for classifying mouse USVs: (1) Vogel et al. (2019) classified USVs from C57BL/6J  
166 mice into 9 classes, including 's', 'ui', 'c', 'f', 'up', 'd', 'c2', 'c3', and 'c', using Random Forest  
167 (Breiman, 2001), an ensemble learning classifier of decision trees. To provide input, 104 features had  
168 first been extracted for 25-high signal-to-noise-ratio (SNR) instances from each class, and their classifier  
169 yielded a classification accuracy of 85%. (2) (Coffey et al., 2019) developed a classifier (in DSQ) based  
170 on Convolutional Neural Networks (CNNs) (Krizhevsky et al., 2012), which was trained on 56000 USVs  
171 acquired from B6D2F1 mice (MouseTube dataset). Using interpolated spectrogram images, it categorizes  
172 USVs into 5 default classes: 'split', 'ui', 'rise', 'c', and 'c2'. (3) We (Abbasi et al., 2019) classified the  
173 elements detected from adult wild-derived house mice (*Mus musculus musculus*) into the classes 'c2',  
174 'c3', USVs without jumps ('no-jump'), and FP. In this work, the supervised CNNs was trained using  
175 1200 samples and fed by 2D Gammatone filtered spectrograms (GSs), adapted to the frequency range of  
176 mice. The evaluation of its performance showed a macro-F1 score of  $90 \pm 2.7\%$ . (4) Recently, (Premoli  
177 et al., 2021) classified USVs of mice into 10 classes using different machine learning methods. The  
178 classes included 'c', 'h' (i.e., 'c' with additional calls of different frequencies), 'c2', 'up', 'd', 'ui', 's',  
179 'f', 'c3', and 'composite' (i.e., two harmonically independent components). They used 48,669 USVs of  
180 NF-kB p50 knock-out mice (B6; 129P2-Nfkb 1tm 1 Bal/J) and control wild-type mice (B6; 129PF2).  
181 Avisoft was used for USV detection. They compared the performance of CNNs fed by spectrogram  
182 images and different classical machine learning algorithms (including support vector machines) fed by  
183 20 features. The features were obtained by Avisoft. They concluded that there is a 'significant' advantage  
184 using images, which contain the entire time/frequency information of the spectrogram (78.8% accuracy),  
185 rather than a subset of numerical features for classifying USVs (73.9% accuracy).

186 Since the generalizability of USV classifiers has never been investigated (unlike methods for  
187 classifying bird vocalizations (Brandes, 2008)), it is not known how well the current methods can classify  
188 USVs for novel datasets. So again, for this task, a systematic evaluation on a new dataset neither used

189 for training nor for the testing is interesting. We identified three key factors that can reduce the  
190 performance and generalizability of USV classifiers:

191 (1) Noise is a potential problem for classification, as for detection, but this issue has not received  
192 sufficient consideration. Some methods only used high-SNR data for developing their models and to  
193 improve their classification performance (e.g., (Vogel et al., 2019), (Coffey et al., 2019), and (Premoli et  
194 al., 2021)). This step results in reduced performance for newly recorded low-SNR recordings (Wu et al.,  
195 2008), which are common in practice, as argued above. This problem is exacerbated if the model is  
196 developed using predefined features extracted from spectrograms (e.g., see (Vogel et al., 2019)), as the  
197 extraction of these features from low-SNR signals already introduces high variance.

198 (2) Imprecise USV detection generates follow-up classification errors. As the main output after  
199 detection is usually the time and frequency range of USVs, the classification will only include the region  
200 of the spectrogram limited to the detected minimum and maximum USV frequency (Coffey et al., 2019;  
201 Vogel et al., 2019). Our investigations, however, revealed that faint portions of USVs are often not  
202 included inside this window, leading to significant errors in feature estimation and classification.

203 (3) Limited training and evaluation inflate model performance. The performance of any model is  
204 over-optimistic whenever the same type of data (same mouse strain or recording contexts) is used for the  
205 model development and also its evaluation (Abbasi et al., 2019; Premoli et al., 2021; Vogel et al., 2019).  
206 Using such a limited training set conceals the model's shortcomings in dealing with different strains or  
207 recording conditions, but surprisingly, no previous studies have considered this issue.

208 Thus, to develop new and improved methods for USV classification, we aimed at the following  
209 principles:

210 (1) Develop the first classifier based on the CNNs algorithm, which is accurate even with noisy  
211 (low-SNR) data.

212 (2) Use the full time-frequency images based on the entire frequency range and reduce the  
213 dimensionality (and thereby the computational load) using Gammatone filters applied to the  
214 spectrograms.

215 (3) Compare our new method with DeepSqueak (DSQ), which is currently the state-of-the-art  
216 classification tool, and evaluate it using USVs recorded under different conditions and from different  
217 mice strains than the conditions and strains used in the training step.

## 218 **2. DATA and METHOD**

### 219 **2.1. USV data**

#### 220 **2.1.1. Subjects**

221 The data used in this study was first divided into two meta-sets: we have used one development set (DEV)  
222 to develop, train and test the developed detection and classification method. To test the generalizability  
223 of the methods we use an additional evaluation (EV) set. For a direct test, as well as estimating the meta-  
224 parameters of the classifier, using stratified 8-fold cross-validation, the DEV dataset was further divided  
225 into three subsets including DEV\_train, DEV\_validation, and DEV\_test (see Table 1). We report the  
226 performance of the proposed classifier in Sections 3.2 and 3.3 over the DEV\_test dataset. The DEV  
227 dataset (Zala et al., 2020; Zala et al., 2017a) combined two pre-existing datasets: the first dataset was  
228 from 11 wild-derived male and 3 female mice (*Mus musculus musculus*) recorded for 10 min in the  
229 presence of an unfamiliar female stimulus (Zala et al., 2017b). In the second data set, 30 wild-derived  
230 male mice (*M. musculus musculus*) were recorded for 10 min in the presence of an unfamiliar female on  
231 2 consecutive days, first sexually unprimed and then sexually primed (Zala et al, unpublished data).  
232 These were F1 and F2 descendants from wild-caught mice, respectively, which for brevity, we refer to  
233 as 'wild mice.'

234 The EV dataset consists of two datasets, and a part was obtained from wild mice ('EV\_wild') (as  
235 in DEV), but under different conditions (Marconi et al., 2020). The vocalizations were obtained from 22  
236 sexually experienced adult wild-derived (F3) male *M. musculus musculus* (Marconi et al., 2020). Male  
237 vocalizations were recorded without and also during the presentation of a female urine stimulus over  
238 three recording weeks, one time per week and each time for 15 minutes. To evaluate classifier  
239 performance, we used three arbitrarily chosen recordings out of these 66 recordings, and manually  
240 classified them for this study. The other part of the EV data is taken from the MouseTube dataset used  
241 for developing DSQ ('EV\_lab') (B6D2F1 mice recorded by Chabout et al. (2015)) and two arbitrarily  
242 selected recordings were sampled out of these 168 recordings. Although we only used a few recordings  
243 to evaluate the methods, these recordings contained a large number of USVs (Table 1). See Section  
244 Supplementary materials for more detailed information on all datasets.

#### 245 **2.1.2. Detection**

246 For USV detection, we applied A-MUD (version 3.2) using its published default parameters for both the  
247 DEV and the EV datasets. Because FPs and syllables are detected during the detection process, we call  
248 the detected USVs 'elements' rather than 'syllables'. The parameters that affect A-MUD performance



249 are o1\_on, o1\_off and if oo is enabled, oo\_on and oo\_off, which are amplitude thresholds in decibel. For  
250 this study, we use two A-MUD outputs: the elements time slot and the estimated track of the  
251 instantaneous frequency over time (frequency track; FT), called ‘segment info’ (Fig. 1). We also  
252 compared A-MUD to the three other detection tools, MUPET, DSQ, and USVSEG. To ensure a  
253 comparison, where AMUD is certainly not privileged, the parameters of AMUD were fixed while those  
254 of the other approaches were optimized, through trial-and-error, i.e., we used the best parameters, which  
255 provide the highest true positive rates for each detection tool, and not the default settings. The parameters  
256 used for evaluating the different tools are presented in Table 1 in Supplementary materials.

257 Since the detection tools that we compared in this study were developed and evaluated using  
258 USVs of wild mice (A-MUD) and laboratory mice (DSQ, USVSEG, and MUPET), we also use USVs  
259 from both types of mice for our evaluation (two recordings for wild mice from the DEV and EV\_wild +  
260 two recordings for the lab mice from EV\_lab). The DEV\_1 (1 sound file from DEV data), EV\_wild\_1  
261 (sound file 1 from EV\_wild data), EV\_lab\_1 (sound file 1 from EV\_lab data), and EV\_lab\_2 (sound file  
262 2 from EV\_lab data) signals consist of 947, 771, 1013, and 1224 USVs, respectively.

### 263 **2.1.3. Manual annotation of detections**

264 After automatically detecting all elements, the DEV dataset was manually classified into 12  
265 classes (Figure 2), depending on the USVs’ spectro-temporal features (Hanson et al., 2012; Marconi et  
266 al., 2020; Musolf et al., 2015; Nicolakis et al., 2020; Scattoni et al., 2008; Zala et al., 2020) (Table 2 in  
267 Supplementary materials). These classes are based on frequency changes (Zala et al., 2020) (> 5 kHz  
268 increase “up”, > 5 kHz decrease “d”), on the number of components (corresponding to breaks in the  
269 frequency track; “c2” with 2 and “c3” with 3 components), on changes of frequency direction ( $\geq 2$   
270 changes “c”) or shape (u-shape, “u”, u-inverted shape, “ui”), on frequency modulation (< 5kHz, “f”), on  
271 time (5-10 ms, “s”, < 5ms, “us”), and harmonic elements, “h”. It is worth noting that there are 2 more  
272 USV classes, USVs with 4 “c4” and 5 “c5” components. Due to their infrequency, however, they are  
273 excluded from the training task (DEV dataset), but they are used for the evaluation step (EV dataset).

274 When using low-SNR recordings, or recordings with faint or short USVs, certain background  
275 noises are sometimes mistakenly detected as USVs. These errors are false positives (FPs), whereas USVs  
276 that are missed are false negatives (FNs). As mentioned above, minimizing one of these types of errors  
277 increases the other one, due to inevitable tradeoffs in signal detection (Macmillan et al., 2004). FPs are  
278 preferable over FNs, as they can be excluded in a follow-up step, and thus we included ‘FP’ as a target  
279 class. The DEV dataset contained 16958 elements including 6465 FPs in total (Table 1).

280 **Table 2. Number of instances for each class in the different datasets**

| Data set       | Number of members in each class |     |       |    |    |     |      |      |     |      |    |     |     |      |
|----------------|---------------------------------|-----|-------|----|----|-----|------|------|-----|------|----|-----|-----|------|
|                | C                               | c2  | c3    | c4 | c5 | h   | d    | up   | u   | f    | us | S   | ui  | FP   |
| DEV_train      | 308                             | 241 | 69    | 0  | 0  | 124 | 299  | 4343 | 298 | 1277 | 74 | 291 | 543 | 4849 |
| DEV_validation | 53                              | 42  | 12    | 0  | 0  | 21  | 52   | 753  | 52  | 221  | 13 | 51  | 94  | 840  |
| DEV_test       | 50                              | 39  | 11    | 0  | 0  | 20  | 48   | 695  | 48  | 205  | 12 | 47  | 87  | 776  |
| EV_wild        | C                               | c2  | split |    |    |     | Rise |      |     |      |    | ui  | FP  |      |
|                | 20                              | 224 | 334   |    |    |     | 1025 |      |     |      |    | 110 | 234 |      |
| EV_lab         | 61                              | 404 | 739   |    |    |     | 819  |      |     |      |    | 200 | 389 |      |

281

282 When comparing our model with DSQ, the EV data (EV\_lab and EV\_wild) were manually  
 283 labeled into 6 classes: ‘c2’, ‘split’ (pool of ‘c3’, ‘c4’, ‘c5’, and ‘h’), ‘c’, ‘ui’, ‘FP’, and ‘rise’ (pool of  
 284 ‘up’, ‘d’, ‘f’, ‘s’, ‘us’, and ‘u’). We created the classes ‘split’ and ‘rise’ because DSQ reported them  
 285 together with ‘c2’, ‘c’, ‘ui’, and ‘FP’ as the output classes. The EV dataset consisted of 4500 elements  
 286 including FP, of which 1947 and 2615 instances belonged to wild mice and lab mice, respectively.

#### 287 **2.1.4. Input images for the classifier**

288 Handcrafted, pre-determined features (such as slope, modulation frequency, number of jumps, etc.) are  
 289 affected by noise, so the development of a classifier based on these features increases the error of the  
 290 classification, as discussed in the Introduction. Therefore, we developed an imaged-based supervised  
 291 classification built on the STFT of detected elements, followed by a set of filters and a zero-padding  
 292 method (Figure 1).

293 After applying the time segmentation obtained from A-MUD, a 750-point Short Time Fourier  
 294 Transform (STFT) (Oppenheim et al., 1999) (NFFT = 750) with a 0.8-overlapped Hamming window is  
 295 applied to the signals, as shown in Figure 1. The desired information in the frequency interval of 20 kHz  
 296 to 120 kHz is extracted (“TF windowing”, Figure 1). Then, following Van Segbroeck et al. (2017), a  
 297 Gammatone (GT) filter bank (De Boer et al., 1978) is used to reduce the size of the STFT array along  
 298 the frequency axis from  $251 \times 401$  to  $64 \times 401$  while simultaneously maintaining the key spectro-  
 299 temporal features. This reduction can be interpreted as a pooling operator using a re-weighting step,  
 300 similar to filterbanks adopted to human auditory perception (Balazs et al., 2017). Note that we adapted

301 the frequency distribution to make our method applicable to the auditory range of mice (Van Segbroeck  
302 et al., 2017).

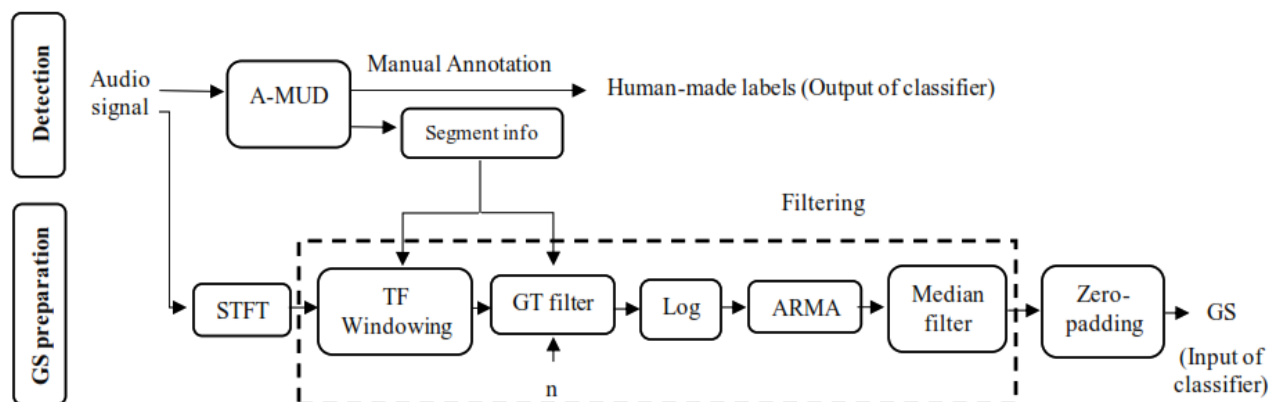

303

304 **Figure 1. Block diagram showing the procedure for USV detection and input preparation for the classifier.** *n* is the  
305 Gammatone (GT) filter order. STFT, A-MUD, ARMA, and GS are the abbreviation for short-time Fourier transform,  
306 automatic mouse ultrasound detector, autoregressive moving-average, and Gammatone spectrograms, respectively. TF in ‘TF  
307 windowing’ is the abbreviation for time-frequency.

308

309 GT filter bank computations are provided in a MATLAB script by (Slaney, 1998). These  
310 computations were converted into the Python language for the present study. For each filter, a central  
311 frequency and bandwidth are required. The bandwidth and center frequency equations obtained in  
312 MUPET are also employed here (see Supplementary materials). In MUPET, the midpoint frequency  
313 parameter (Equation 2 in Supplementary materials) used to calculate the central frequencies was chosen  
314 as 75 kHz. The midpoint frequency can be interpreted as the frequency region where most information  
315 is processed (Van Segbroeck et al., 2017). Because the authors acknowledged that this value may not  
316 apply to all mice, we estimated the optimum value by calculating the median frequency (i.e., 63.5 kHz)  
317 from the FTs of all detected syllables, omitting FPs. Then, in a pilot test, we updated this value to 68 kHz  
318 to minimize the information loss from USVs. The central frequency was calculated based only on the  
319 DEV data. A more detailed explanation of how to determine these two parameters is given in the  
320 Supplementary materials (the Gammatone filterbank section). To further eliminate the background noise  
321 from the images, following MUPET, we calculated the maximum value between the Gammatone-filtered  
322 STFT pixels and the floor noise ( $10^{-3}$ ). The logarithm of the output was smoothed using an auto-  
323 regression moving-average (ARMA) filter (C.-P. Chen et al., 2002) with order 1 (see Supplementary  
324 materials). Finally, a median filter (T. Huang et al., 1979) was applied to remove stationary noise. The  
325 product of the pre-processing is a smoothed, denoised spectrogram with a reduced size of 64\*401, called  
326 Gammatone spectrograms (GSs). Figure 2 shows the GSs of five samples of each 12 studied classes.  
327 These samples have the minimum Manhattan distance to other members of each class.

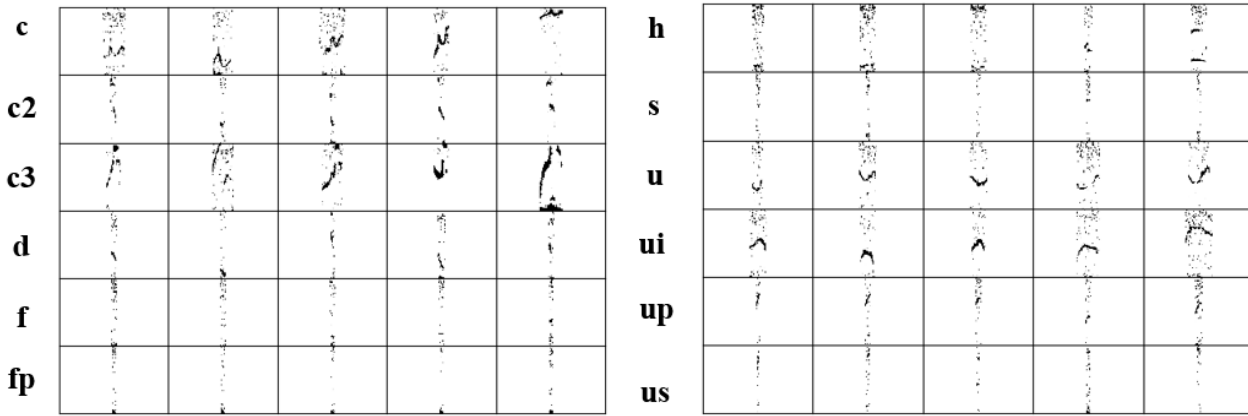

328

329 **Figure 2. Gammatone Spectrograms (GSs) of five of five members of 12 studied classes that have the minimum**  
 330 **Manhattan distance to other members of 12 USV classes in the development (DEV) dataset.**

331  
 332

## 333 2.2. CNN classifier

334 For our study, we used convolutional neural networks (CNNs), a particular form of the deep neural  
 335 network (Goodfellow et al., 2016) first introduced by (Fukushima, 1980) and further developed by  
 336 (LeCun et al., 1998). The following is a brief description of how this model works and how we  
 337 implemented it.

### 338 2.2.1. Classifier architecture

339 We used several layers: an input layer, convolution layers, pooling layers, two fully connected (FC)  
 340 layers, and the output layer. The extraction of information in the CNNs is based on the 2D convolution  
 341 of kernels and their receptive fields (areas on the input image determined by height and width of the  
 342 kernel). The 2D convolution is performed by sliding the kernel over the entire image. The resulting matrix  
 343 is called a feature map ( $z_{ij}$ ):

$$344 z_{ij} = \sum_{m=0}^{M-1} \sum_{n=0}^{N-1} w_{mn} \cdot x_{(i+m+stride-1)(j+n+stride-1)} + b_{ij}, \quad (1)$$

$$345 a_{ij} = \sigma(BN(z_{ij}))$$

346 Here,  $w$  is the convolution kernel matrix,  $b$  is the bias,  $x$  is the input image, and  $M$  and  $N$  are the  
 347 lengths and the width of the kernel. In Equation 2, the stride parameter specifying the number of pixels  
 348 to shift the convolution filter is 2 for the first layer and 1 for all other convolutional layers. The batch  
 349 size represents the number of training samples used for training before updating the network weights  
 350 during one epoch. We trained our network with a batch size of 32 with 200 epochs. The batch-

351 normalization layer (BN) (Ioffe et al., 2015) is calculated by normalizing the input of the layer by  
352 subtracting the batch mean and dividing it by the batch variance. The nonlinear activation function ( $\sigma$ )  
353 is applied to each layer output. In the current study, ELU (Clevert et al., 2015) is used for all layers except  
354 for the last one (it is softmax for the last one). After applying the activation function on the feature maps,  
355 the size of its output is reduced using a pooling layer. We used maximum pooling, which applies no  
356 smoothing and retains the key features of the image (Scherer et al., 2010). Then, the output of the last  
357 convolution layer is assigned to the FC layers to allow interactions also on a global level. The activation  
358 function of the last layer is the softmax function. The final output is calculated by taking the maximum  
359 of the softmax function output. Other activation functions (like ELU) provide an output of real-valued  
360 scores that are not conveniently scaled to be used as classifier output. However, the softmax function  
361 partitions the probability among the classes helping with the interpretation of the output, without loss of  
362 information.

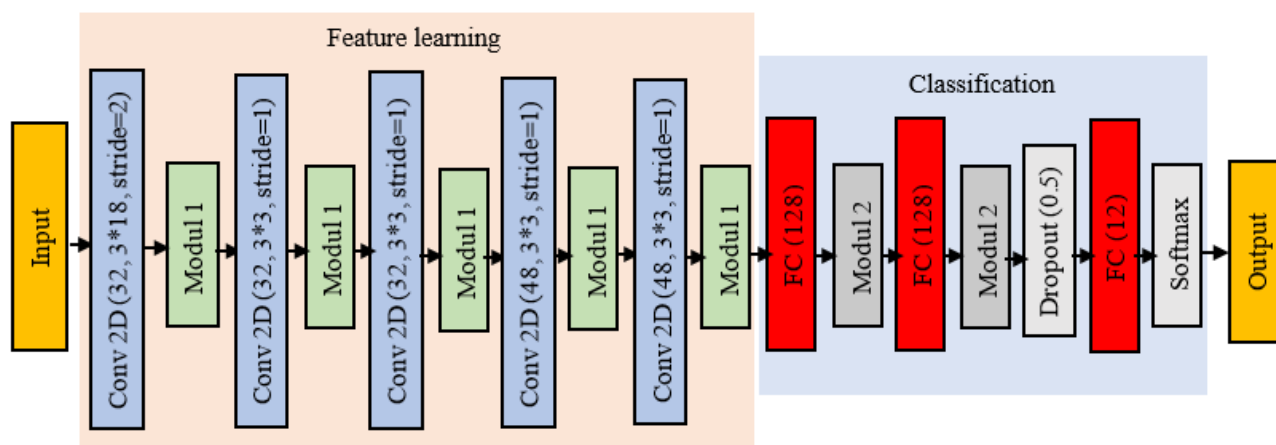

363

364 **Figure 3. Classifier architecture.** Module 1 consists of the following layers: Batch normalization + ELU + Maxpooling  $2*2$ .  
365 Module 2 consists of the following layers: Batch normalization + ELU. Conv2D (32, 3\*18) is a 2-dimensional convolution  
366 layer with a kernel size of 3\*18 and the number of filters is 32. FC (128) is a fully connected layer with 128 neurons.

367

368 The architecture of our network is shown in Figure 3. In this depiction, e.g., Conv2D (32, 3\*18)  
369 denotes a 2-dimensional convolution layer with a kernel size of 3\*18 and 32 filters. The FC (128) is a  
370 fully connected layer with 128 neurons. After two FC layers, a dropout layer with the probability of 0.5  
371 is used. This step reduces the risk of overfitting (Srivastava et al., 2014). Our model has 110k parameters  
372 to be determined. The implementation is based on the Keras library ("Keras,") (version 2.2.4) and we run  
373 the models training on the Acoustic Research Institute's clusters with 64 GB RAM, 12-core CPUs, and  
374 NVIDIA Titan Xp GPUs, and the other with 64 GB RAM, 8-core CPUs, and NVIDIA GeForce GT  
375 GPUs.

376 Data processing and analysis were conducted using Python 3.6, employing NumPy 1.16.2. Also,  
377 Sklearn 0.22.1 was used as the framework for model building and training. Figures were produced with  
378 Matplotlib 3.1.3.

### 379 **2.2.2. Methods for optimization and loss function**

380 In machine learning algorithms, the general aim is to find the optimal weight to minimize the loss  
381 function. In this study, we used the categorical cross-entropy (CCE) (Goodfellow et al., 2016; Murphy,  
382 2012), which computes the dissimilarity between the distribution of the classifier output and the manual  
383 labels. For the reduction of the overfitting (Y. Chen et al., 2016),  $L^2$  regularization (Hoerl et al., 1970),  
384 also known as Tychonov or Ridge, is added to CCE as follows,

$$385 \quad \text{Loss function} = \text{CCE} + \frac{\lambda}{2m} * \sum \|w\|^2, \text{ where } \text{CCE} = - \sum_{i=1}^c y_i \log(p_i) \quad (2)$$

386 Here,  $w$  is the weights matrix of the CNN,  $\| \cdot \|$  is the  $L^2$  norm, the regularization parameter  $\lambda$  is  
387 set to  $10^{-4}$  and  $m$  is the batch size. The ground truth is denoted by  $y_i$  while  $c_i$  denotes the predicted  
388 probability of a training sample (i.e., the output of the last layer).  $c$  is the number of classes. To optimize  
389 the loss function, we used the stochastic gradient descent with Nesterov momentum (Nesterov, 1983)  
390 and we initialized the weights of the convolution and FC layers using the He-initialization (He et al.,  
391 2015).

392 To reduce overfitting and to promote the generalizability of the model (C. Chen et al., 2020), we  
393 performed the augmentation of the training dataset using random shifts of width and height by 10%.  
394 Other augmentation methods such as zooming and normalizing were excluded from this setup as in pilot  
395 tests, they increased the validation error of the classifier.

### 396 **2.2.3. Imbalanced data distribution**

397 As shown in Table 1, the DEV\_train dataset is significantly unbalanced, with 69 occurrences of the c3  
398 and 4849 of the FP class, a typical situation in real applications of machine learning. To investigate how  
399 this uneven distribution affects the performance of the classifier, we fit the model with the original  
400 DEV\_train data and it was resampled by three different approaches.

401 (1) In the first approach, the original input data are bootstrapped 10 times to increase the  
402 generalizability and reliability of the classifier (Anguita et al., 2000; Yan et al., 2015). In each bootstrap  
403 iteration, samples are drawn from the original dataset with repetition, so some samples may appear more  
404 than once or some not at all. Then, we fitted a model for each bootstrapped dataset. The final model

405 performance was evaluated by the average over the 10 models. Bootstrapping reduced the ratio of data  
406 imbalance from 76 to 4.

407 (2) In the second scenario, all classes, except the classes ‘c3’ and ‘us’, which only have a  
408 maximum data number of 69 and 74, are randomly under-sampled to 124 samples.

409 (3) In the last scenario, all classes, except FP and ‘up’, are over- and under-sampled to the number  
410 of samples of the majority class, i.e., 4849. We used the Synthetic Minority Oversampling Technique  
411 Edited Nearest Neighbor (SMOTEENN) (Batista et al., 2004) and the number of neighbors was selected  
412 as 3.

413 To tackle the imbalanced distribution, during the model training we also weighed the loss function  
414 inversely proportionally to the number of class members (King et al., 2001) for the original, bootstrapped,  
415 and under-sampled data using the following equation:

$$416 \quad WCCE = - \sum_{i=1}^c cw_i y_i \log(p_i), \quad \text{where } cw_i = \frac{N}{c * n_i} \quad (3)$$

417 N and  $n_i$  are the total number of samples and class members. CCE in equation 2 was updated to WCCE.

#### 418 **2.2.4. Model ensemble**

419 The weights optimized on a particular dataset are not guaranteed to be optimal (or even useful) for  
420 another dataset. At the same time, different machine-learning algorithms can lead to different results  
421 even for the same dataset. In ensemble methods (Zhou, 2012) the final output is taken from combining  
422 the outputs of different models and thus reducing the variance of the classifier output. Rather than training  
423 a model from scratch for different sets of hyperparameters, we produced 5 trained models during the  
424 training of a single model using Snapshot Ensemble with cosine annealing learning rate scheduler (G.  
425 Huang et al., 2017). They were trained consecutively, so the final weights of one model are the initial  
426 weights of the next. In this approach, the CNN weights are saved at the minimum learning rate of each  
427 cycle (Figure 2 in Supplementary materials), which occurs after every 40 epochs. To determine the best  
428 combination of these 5 models, we have cross-validated 4 approaches: 1) using the predictions of the 5th  
429 model, 2) using the average prediction from the last 3 models, 3) combining the predictions of the last 3  
430 models by Extreme Gradient Boosting Machines (XGBMs) (T. Chen et al., 2016), and 4) combining the  
431 predictions of all 5 models using XGBMs. In explaining the third and fourth methods, instead of taking  
432 the average of the predictions (used for the second method), the predictions of the last three and five

433 models of the DEV\_validation data together with their ground truth are used for training the XGBMs. In  
434 this case, the final output of the classifier is the output of XGBMs.

435 Thus, to develop our classifier, these four ensemble methods were applied for each resampling  
436 approach namely under-sampling, over-sampling, and bootstrapping, and for the original data.

### 437 **2.3. Statistical test**

438 To determine whether the duration of USVs was statistically significant over- or under-estimated  
439 by a detection tool, a regression line (i.e.,  $y = b_0 + b_1 * x$ ) was fitted between the estimated (x) and  
440 observed USV duration (y). This regression line was obtained based on ordinary least squares, which is  
441 a maximum likelihood estimator. Then, using a t-test, the P-values were calculated for the estimated  
442 intercept (b<sub>0</sub>) and slope (b<sub>1</sub>) of the regression line. These P-values assess whether the coefficients are  
443 significantly different than zero. These analyses were conducted using a Python module called  
444 statsmodels.

### 445 **2.4. Inter-observer reliability (IOR)**

446 Our ground truth (or 'gold standard') was based on manual classification, and we used two  
447 independent observers to classify USVs and to evaluate our ground truth, we evaluated inter-observer  
448 reliability (IOR). The first 100 USVs of 10 sound files were manually classified into 15 USV types by  
449 two of the authors, and both have much experience (Nicolakis et al. (2020), Marconi et al. (2020), and  
450 Zala et al. (2020)). We used five arbitrarily selected sound files from the DEV dataset and all five sound  
451 files used for the EV dataset (EV\_wild and EV\_lab). Both observers were blind to their respective labels  
452 and to the original labels used for the development or evaluation of *BootSnap*. The USV labels were  
453 extracted and exported into *Excel* files. The exported parameters included the start time, end time, and  
454 USV type of each vocalization. Then, the labels from both observers were aligned according to the start  
455 time of each segment. Thus, vocalizations with the same starting time were compared between the two  
456 observers. Segments that were labeled as false positive by the observers but detected by A-MUD as  
457 candidate USVs, were included and segments that were labeled as unclassified (“uc”) and were excluded  
458 from the analyses. Segments classified as the same type by both observers were scored as 'agreement'.  
459 Segments that were either detected by only one observer or were classified into a different class were  
460 scored as 'disagreement'. Then, we calculated the percentage of correctly classified USVs by both  
461 observers, reported as IOR. We calculated the IOR for DEV and EV data for all segments (including  
462 FPs), and when including and excluding USVs detected by only one observer and not the other (i.e.,  
463 labeled as ‘missed’ USVs). In addition to the original data, we calculated the IOR and F1-score when



464 excluding ‘s’ and ‘us’ classes, to evaluate how these two classes affected the IOR, and when pooling the  
465 original data into 12, 11, 6, 5, 3, and 2 classes, respectively, to compare the IOR and F1-score with the  
466 performance of *BootSnap* (see Table 6 and Table 7).

## 467 **2.5. Performance statistics**

468 The performance of the detection tools was evaluated based on TPR and FPR, which are defined  
469 as follows:

$$470 \quad TPR = recall = \frac{tp}{tp + fn}, \quad (4)$$

$$471 \quad FPR = \frac{fp}{fp + tn},$$

472 where  $tp$  and  $fp$  are true and false positives, i.e., the number of correctly and falsely detected  
473 samples of USVs, while  $tn$  and  $fn$  are true and false negatives, i.e., the correct and false number of omitted  
474 USVs.

475 To evaluate the performance of the classifiers, the macro F1-scores, i.e., the unweighted average  
476 of the F1-score of each class was calculated. This metric, unlike accuracy, is not affected by the  
477 imbalance distribution of the classes (Sun et al., 2009). We also used TPR and FNR (Equation 6) for  
478 producing a confusion matrix (Sammut et al., 2011).

479

$$480 \quad f1 - score = 2 * \frac{precision * recall}{precision + recall}, \quad \text{where} \quad (5)$$

$$481 \quad precision = \frac{tp}{tp + fp}$$

$$482 \quad FNR = \frac{fn}{fn + tp} \quad (6)$$

## 483 **3. RESULTS**

### 484 **3.1. Comparing detection algorithms**

485 Figure 4 shows the performance (TPR and FPR) of the four detection tools, MUPET, DSQ, USVSEG,  
486 and A-MUD. A-MUD was tested using its default parameters, whereas the others were implemented  
487 using the combination of parameters that provided the best results for the chosen dataset. We also

488 compared the performance of these methods using other parameters (see Figure 2 in Supplementary  
489 materials).

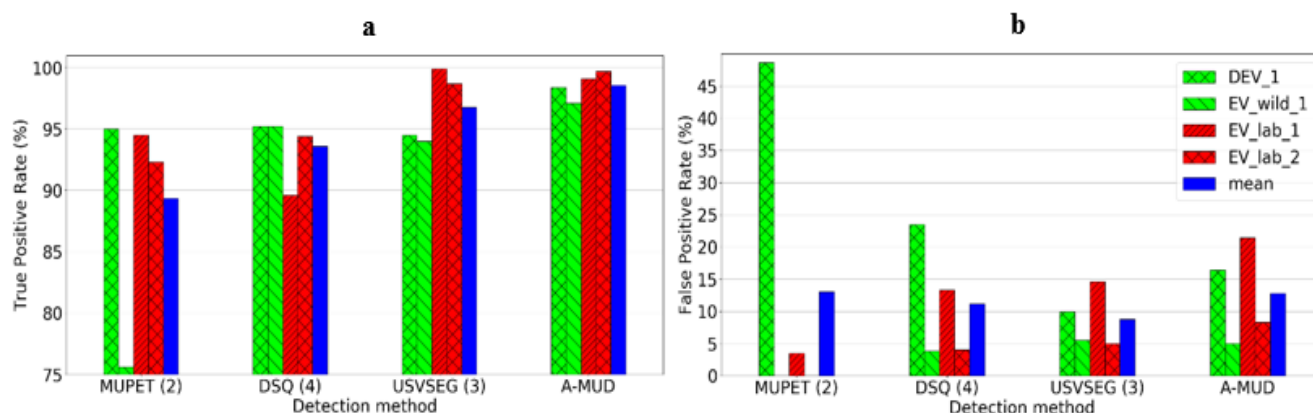

490

491 **Figure 4. Best performance of four USV detection methods for four recordings.** (a) The True Positive Rate shows the  
492 ratio of the number of USVs correctly detected to the total number of manually detected USVs \* 100. (b) The False Positive  
493 Rate shows the ratio of the number of unwanted sounds (noise) incorrectly detected as USVs to the total number of detected  
494 elements \* 100. The MUPET (2) method implemented MUPET with the noise-reduction parameter set at 5 and a minimum  
495 frequency of 30 kHz (Van Segbroeck et al., 2017). DSQ (4) used DSQ detection with the short rat call\_network\_v2 network  
496 with a high “recall” parameter (Coffey et al., 2019). USVSEG (3) applied USVSEG detection with the threshold parameter  
497 set at 3.5, the minimum gap between syllables at 5ms, and the minimum length of USVs at 4 ms (Tachibana et al., 2020). A-  
498 MUD was run using its default parameters (Zala et al., 2017a). The legend shows the four recordings that were compared for  
499 each method (i.e., lab mice vs wild mice for both DEV (i.e., DEV\_1 and EV\_wild\_1) and EV datasets (i.e., EV\_lab\_1 and  
500 EV\_lab\_2) and the mean of these four recordings. DEV\_1 and EV\_lab\_1 are examples of high-SNR recordings and EV\_lab\_2  
501 is an example of low-SNR recording.

502

503

504 A-MUD (using the default parameters) correctly detected the largest number of USVs (TPR were  
505 all >97%), though it was closely followed by USVSEG (using the optimal parameters), and MUPET had  
506 the lowest mean TPR (<90%) (Figure 4a). A-MUD and USVSEG also provided the best performance  
507 when evaluating the detection of USVs from low-SNR recordings (DEV\_1 and EV\_lab\_1, which include  
508 USVs from wild-derived and laboratory mice, respectively). We evaluated the performance of USVSEG  
509 using recordings of lab and wild mice and found that it has a higher TPR for lab mice. This result is likely  
510 because this method is primarily parameterized and evaluated based on recordings of lab mice. In  
511 contrast, A-MUD has a high TPR for both types of data, despite that it was parameterized and evaluated  
512 using recordings of wild mice only. The presence of faint USVs (in EV\_wild\_1) had little effect on the  
513 TPR for most methods, except MUPET (the TPR for this method was reduced from 95% to 75.6% when  
514 recordings contained faint USVs). When comparing FPRs, we found that USVSEG had the lowest error  
515 rates, though all four methods were similar ranging from 8% to 13% (Figure 4b). It is possible to improve  
the model's performance to reduce the FPRs with an additional refinement step (see next section).

516 Here, we compared the estimated USV duration by USVSEG and A-MUD with the observed  
 517 USV duration (i.e., manually checked and corrected USV duration). In wild mice, USVSEG  
 518 underestimated the duration of USVs compared to A-MUD, which had a higher accuracy than USVSEG  
 519 (Figure 5a). The duration of USVs and the mean bias values (-3.81 ms vs -0.39 ms; Figure 5c) were  
 520 significantly underestimated by USVSEG (see Table 3). Also, the R-squared ( $R^2$ ) and root-mean-square  
 521 error (RMSE) values, which show the correlation of the predicted and observed values and the standard  
 522 deviation of the prediction error, respectively, show that A-MUD estimated the duration of USVs from  
 523 wild mice with higher accuracy.

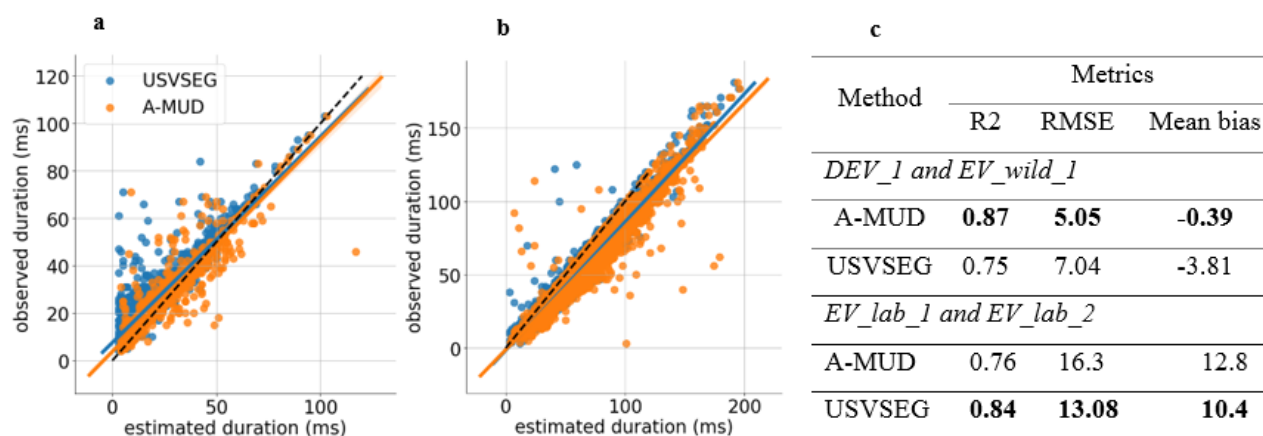

524  
 525 **Figure 5. Joint plot between manually corrected (i.e., observed) and estimated duration of detected segments (by A-**  
 526 **MUD (orange) and USVSEG (blue)) in (a) DEV\_1 and EV\_wild\_1 data and (b) EV\_lab\_1 ad EV\_lab\_2 data. (c)**  
 527 **Evaluation metrics for the linear regression models between observed and estimated duration of segments.** The black  
 528 dashed line in figures (a) and (b) is the identity line. The evaluation metrics in the table (c) are R-squared ( $R^2$ ), root-mean-  
 529 square error (RMSE), and mean bias between observed and estimated duration of segments. Mean bias is the average  
 530 difference between the estimated and observed duration of detected segments.

531  
 532 In contrast, the duration of USVs from laboratory mice was significantly overestimated by both  
 533 methods. Here, USVSEG outperformed A-MUD, as the former had less RMSE (i.e., 13.08 vs 16.3) and  
 534 higher  $R^2$  (i.e., 0.84 vs 0.76) than the latter. The overestimation of the duration of the USVs by both  
 535 methods is probably because the USVs from lab mice were very loud and, in most cases, had a strong  
 536 echo, so both methods considered these echoes as the USVs themselves. However, for the observed  
 537 durations, the USVs were shortened to the end of the clear tone of the USVs.

538

539

540 **Table 3. Statistical tests comparing observed and estimated USVs duration for DEV\_1 and EV\_wild\_1 and**  
 541 **EV\_lab\_1 ad EV\_lab\_2 data by A-MUD and USVSEG.**

| Parameters                  | Estimate | Std. error | t value | P value                     |
|-----------------------------|----------|------------|---------|-----------------------------|
| <i>DEV_1 and EV_wild_1</i>  |          |            |         |                             |
| Intercept_A-MUD             | 3.7885   | 0.298      | 12.693  | 2.920787*10 <sup>-35</sup>  |
| Slope_A-MUD                 | 0.8941   | 0.009      | 104.872 | < 2.22*10 <sup>-16</sup>    |
| Intercept_USVSEG            | 7.5821   | 0.318      | 23.863  | 4.396634*10 <sup>-108</sup> |
| Slope_USVSEG                | 0.8684   | 0.010      | 87.224  | < 2.22* 10 <sup>-16</sup>   |
| <i>EV_lab_1 ad EV_lab_2</i> |          |            |         |                             |
| Intercept_A-MUD             | -1.1628  | .045       | -2.58   | 9.8* 10 <sup>-3</sup>       |
| Slope_A-MUD                 | .084     | 0.006      | 149.926 | < 2.22* 10 <sup>-16</sup>   |
| Intercept_USVSEG            | -1.5588  | 0.348      | -4.479  | 8*10 <sup>-8</sup>          |
| Slope_USVSEG                | 0.875    | 0.004      | 195.535 | < 2.22* 10 <sup>-16</sup>   |

542

### 543 **3.2. Selecting the best classifier**

544 To develop our classifier, the detected elements were first manually classified into 12 types of  
 545 USVs (ground truth). In addition to the original data, three types of resampling approaches were  
 546 examined (under-sampling, over-sampling, and bootstrapping) to overcome the uneven distribution  
 547 between USV classes (see Section 2.2.4). For each type of resampling, four model ensemble methods  
 548 were applied to the outputs, which include the predictions of the last Snapshot ensemble ('sn'), the  
 549 average prediction of the last 3 Snapshot ensemble models ('sn\_avg\_3'), and a combination of the  
 550 predictions of the last 3 ('sn\_xgb3') and 5 Snapshot ensemble models ('sn\_xgb5') by XGBMs (see  
 551 Section 2.3.3). Figure 6 shows the performance of the models with different combinations of resampling  
 552 and ensemble methods compared to the control run using the original data.

553 The bootstrap and under-sampling methods always had the highest and lowest average F1-score,  
 554 respectively, regardless of the ensemble method. Using the last model obtained from the Snapshot  
 555 ensemble gave the highest average F1-score (76.6%) with bootstrapping. 'sn\_xgb5' outperformed the  
 556 other ensemble methods for the original data and two other resampling methods (under-sampling and  
 557 over-sampling). The last model of the Snapshot ensemble also provided the lowest variation in

558 bootstrapped data (1.4% STD). The differences between the ensemble methods are not large if used  
559 together with bootstrapping.

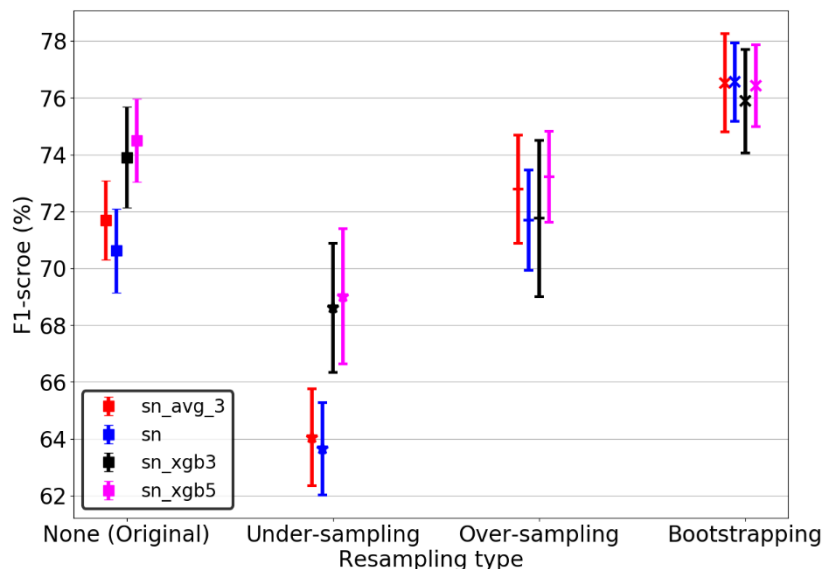

560

561 **Figure 6. Performance of classifiers based on four resampling methods for four types of ensemble models.** For each  
562 type of resampling, four ensemble models have been applied to the outputs, including the predictions of the last Snapshot  
563 ensemble ('sn'), the average prediction of the last 3 Snapshot ensemble models ('sn\_avg\_3'), and combining the predictions  
564 of the last 3 ('sn\_xgb3') and 5 Snapshot ensemble models ('sn\_xgb5') by XGBMs. The mean  $\pm$ SD of macro F1-score of test  
565 datasets over 8-fold cross-validation are shown.

566

567 Neither the under-sampling (F1-scores = 69%) nor the over-sampling (F1-scores = 73.5%)  
568 methods, improved the performance of the model compared to the best model from the original data (F1-  
569 score = 74.5%). While this result is not surprising for the under-sampled case, the performance of the  
570 oversampling case shows that the variance is not a problem for small classes. The poor performance of  
571 the model fed by under-sampled data can be attributed to the random discard of samples and thus the  
572 deletion of useful information. The over-sampling method may have failed to improve the model  
573 performance because the images produced by the SMOTEENN are very similar to the original data  
574 (Figure 7 in Supplementary materials) leading to model overfitting. As a result, the combination of  
575 bootstrapped data and the last Snapshot model provided the best classifier (hereafter called *BootSnap*).

576 Next, we examined the class-wise performance of the best model for each combination of  
577 resampling and ensembling method, including original + 'sn\_xgb5', under-sampled + 'sn\_xgb5', over-  
578 sampled + 'sn\_xgb5', and bootstrapped + 'sn' (*BootSnap*). As shown in Figure 7, *BootSnap* improved  
579 the F1-scores of classes 'c' and 'c3' by about 5% and class 'us' by about 10%. The number of classes  
580 'c3' and 'us' in the original data is lower than in other classes, and bootstrapping seems to effectively  
581 increase the number of class members used during the model development. For classes, 'c2', 'd', 'f', and

582 ‘u’, *BootSnap* increased the average macro F1-score by about 2%-3%. The classes ‘FP’, ‘h’, ‘ui’, and  
 583 ‘up’ in the original + ‘sn\_xgb5’ and *BootSnap* models have approximately equal average macro F1-score.  
 584 Somewhat surprisingly, the average macro F1-score of the classes ‘h’ and ‘ui’ did not increase by  
 585 bootstrapping, so it seems that the number of these data points is sufficient for our method. It appears  
 586 that only for the class ‘s’ bootstrapping did not help, but the abundance of class members of ‘up’ and  
 587 ‘FP’ in the original data defused the effect of bootstrapping. The average macro F1-score of *BootSnap* in  
 588 the class ‘s’ is about 2% less than in the model fed by the original data.

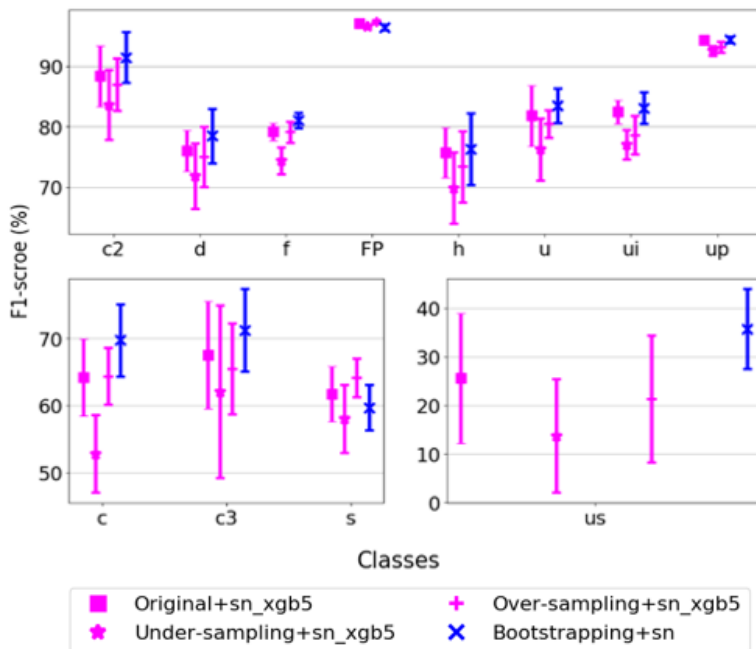

589

590 **Figure 7. Performance of the best model for each combination of resampling and ensemble method for different USV**  
 591 **classes.** The mean  $\pm$ SD of the class-wise macro F1-scores in the 8-fold cross-validation are shown.  
 592

593 *BootSnap* also reduced the variation in the macro F1-scores for almost all USV classes, and the  
 594 largest reduction in variation was for classes ‘u’, ‘c3’, and ‘us’. However, the classes ‘us’ and ‘c3’ had  
 595 the highest macro F1-score STD in all resampling methods; a result that might be due to the very low  
 596 number of samples in these two classes (99 and 93 members respectively).

### 597 3.3. Evaluating *BootSnap* for classifying USVs

598 To evaluate the performance of *BootSnap* for different types of USVs, we generated a row-wise  
 599 normalized confusion matrix (or error matrix) (Sammur et al., 2011). To prepare this matrix, we used the  
 600 manual annotations and predicted labels from *BootSnap* of the test dataset (of 8-fold).

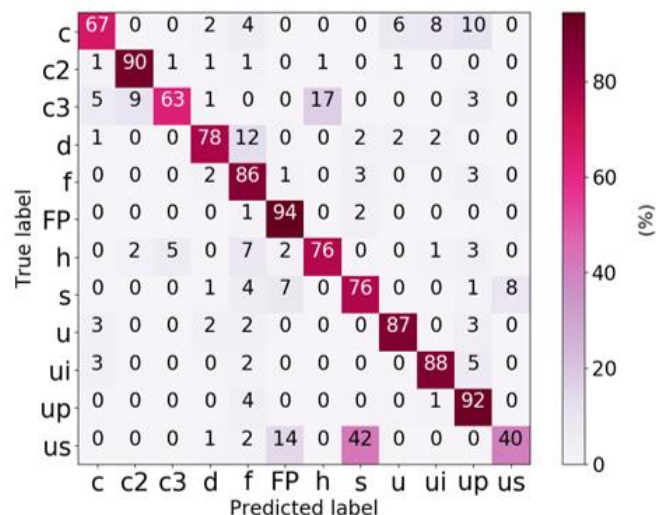

601

602 **Figure 8. Confusion matrix of a 12-class classification using *BootSnap*.** The main diagonal represents the recall of each  
 603 USV class. The other values in each row are FNRs, which indicate the percentage of each class of USVs incorrectly labeled  
 604 or classified.

605

606

607

608

609

610

611

612

613

614

615

616

617

618

619

620

621

622

623

This matrix shows that non-USVs ('FP') were classified with the highest recall (94%), which indicates that our model can successfully detect most falsely identified signals, and exclude them from further processing. It also shows that 40% to 92% of different types of USVs were accurately classified. The lowest recall was the 'us' class, and more than 40% of 'us' were mistakenly labeled as class 's' and 14% of the total members were assigned to the class 'FP'. The classification of 's' syllables (76%) was much more accurate than 'us', and the highest FNR value of this class ('s') belongs to the class 'us'. The misclassification of these two classes can be attributed to the use of the USVs length as the only feature used for manual classification, which is not reliable ('us' also shows much lower inter-observer repeatability in manual classification than other classes; see Figure 6 in Supplementary materials). Class 'c3' had the second-lowest recall (63%), and most of its FNs were found with the classes 'h' (17%), 'c2' (9%), and 'c' (5%). These errors were due to the occurrence of harmonic patterns or faint jumps in the class 'c3'. The class 'c' had the third-lowest recall (67%), despite having a high number of members. The problem is that 'c' syllables were often mis-assigned due to their similarity in the spectrograms to 'ui', 'u', and 'up' types, which resulted in the highest FN rates in these three classes. Examination of the misclassified members of the class 'h' indicates that they were often assigned to the class 'f'. The highest portion of FNR (17%) of the class 'c3' is found with the class 'h'. The FNR of the class 'h' is 5% with class 'c3'. In other words, the members of the class 'c3' are much more likely to be mistaken as the class 'h' than vice versa. It is because harmonic patterns are frequently seen with the second element (out of

624 three elements) in the class ‘c3’, whereas the opposite rarely occurred in our recordings. The explanation  
 625 might be because the ‘h’ has always only one element (+ the harmonic) and the “c3” has three elements.

626 As shown in Figure 2, members of the class ‘d’ resemble the members of class ‘f’, which resulted  
 627 in the class ‘d’ having the most FNs with the class ‘f’. While there is no distinguished pattern of FNs  
 628 distribution in other classes, it is important to note that FNs of the classes ‘c2’ and ‘c3’ mostly occur  
 629 among themselves. Thus, the performance of the classifier is improved after pooling the ‘c2’ and ‘c3’  
 630 classes, as we show next.

### 631 3.4. Inference classification

632 Since it is unclear whether and how mice classify USVs, we report the performance of the best  
 633 classifier (*BootSnap*) based on the different number of classes proposed in previous studies (Table 2). It  
 634 is important to note that, unlike previous studies, we considered FP as a target class. Since *BootSnap* was  
 635 trained using 12 classes, we pooled different types of calls in various combinations, especially for the  
 636 most similar types of syllables, to compare its performance with existing literature treating other numbers  
 637 of classes. This comparison provides some insights into the classification of types of USVs by  
 638 researchers.

639 **Table 4. BootSnap performance in classifying the DEV\_test dataset in various combinations of classes.**

| Basis of classifications | # of classes | Different combinations of syllable types |         |   |   |       |    |    |                     |    |    |                         | Adapted from                                 | F1-score (%)    |                 |
|--------------------------|--------------|------------------------------------------|---------|---|---|-------|----|----|---------------------|----|----|-------------------------|----------------------------------------------|-----------------|-----------------|
| original                 | 12           | FP                                       | up      | d | f | s     | us | u  | ui                  | c  | c2 | c3                      | h                                            | original        | <b>76.7±1.4</b> |
| Pool ‘s’ and ‘us’        | 11           | FP                                       | up      | d | f | short | u  | ui | c                   | c2 | c3 | h                       | (Hanson et al., 2012; Scattoni et al., 2008) | <b>81.1±1.6</b> |                 |
| -                        | 6            | FP                                       | Rise    |   |   |       |    | u  | ui                  | c  | c2 | split                   | (Coffey et al., 2019)                        | <b>86.7±1.9</b> |                 |
| Simple/complex           | 5            | FP                                       | no-jump |   |   |       |    |    | c2                  | c3 | h  | (Wang et al., 2008)     | <b>86.5±2.2</b>                              |                 |                 |
| F- jumps                 | 3            | FP                                       | no-jump |   |   |       |    |    | jumps and harmonics |    |    | (Hoffmann et al., 2012) | <b>95.4±0.6</b>                              |                 |                 |
| FP/USV                   | 2            | FP                                       | USV     |   |   |       |    |    |                     |    |    |                         |                                              | -               | <b>97.1±0.4</b> |

640



641 The number of USV classes studied here ranged between 2 and 12 different types. As expected,  
642 classifying all 12 classes provided the lowest F1-score ( $76.6 \pm 1.4\%$ ). In the next step, the classes ‘us’ and  
643 ‘s’, which differ only in their duration, were pooled to form a new class, labeled ‘short’. By combining  
644 these two classes, we found a significant increase in the F1-score ( $81.1 \pm 1.6\%$ ). In addition, by  
645 combining these two classes, a significant number of ‘us’ and ‘s’ types, which were mistakenly assigned  
646 as each other (Figure 6), were correctly classified as ‘short’. In the next step, the classes ‘up’, ‘d’, ‘f’, ‘s’,  
647 ‘us’, and ‘u’ were pooled to form the class called ‘rise’, and the classes ‘c3’ and ‘h’ were included in the  
648 class ‘split’. Aside from the class ‘u’, a common feature between classes pooled into ‘rise’ was having  
649 no changes in their frequency direction. These classes were mostly false positives in the 12-member  
650 classification, and thus, after pooling, the F1-score significantly increased to  $86.7 \pm 1.9\%$ , compared to  
651 the 11-class classification.

652 Then, according to Wang et al. (2008), the number of classes was reduced to five. We pooled the  
653 classes ‘ui’, ‘c’, and ‘rise’. These classes have no jumps in their spectrograms and thus the pooled new  
654 class was labeled ‘no-jump’. Also, the classes ‘h’ and ‘c3’, which were pooled in the previous step into  
655 the class ‘split’, were separated again, but unlike the previous steps, the F1-score decreased (ca. 0.2%).  
656 This result might have been due to the separation of classes ‘h’ and ‘c3’ causing a large number of  
657 members of the latter class to be classified in the former class (Figure 5 in the Supplementary materials).  
658 In the next step, all the members of the classes ‘c2’, ‘c3’, and ‘h’ were pooled into the class ‘jumps and  
659 harmonics’ and compared with the classes ‘FP’ and ‘no-jump’. As mentioned before, all the FNs of the  
660 classes ‘c2’ and ‘c3’ were from each other (Figure 8), and as a result, pooling them in one class yielded  
661 an F1-score of about  $95.4 \pm 0.6\%$ . Finally, we classified syllables and FP into two separate classes, and  
662 this simple binary classification, which was mostly used in the USV detection step, was able to  
663 differentiate USVs from FPs with an F1-score of  $97.1 \pm 0.4\%$ . These results again show how the  
664 performance of *BootSnap* depends upon the type of USV, and that pooling certain classes results in better  
665 accuracy.

### 666 **3.5. Comparing *BootSnap* and DSQ: transferability to new datasets**

667 We compared the performance of *BootSnap* to DSQ, which we consider to provide the state-of-  
668 the-art classification tool, and we used the EV\_wild and EV\_lab signals (Table 3). *BootSnap* predictions  
669 were pooled into 6 classes, which included ‘rise’, ‘split’, ‘ui’, ‘c2’, ‘FP’, and ‘c’ (DSQ reported them as  
670 the output classes). DSQ distinguishes FPs from USVs using a post hoc denoising network (Coffey et  
671 al., 2019) before the classification step. For comparison, we considered FP as one of DSQ’s final output.  
672 Since *BootSnap* was developed based on 8 folds, we used the mode of 8 predictions to compare it with

673 the DSQ output. It is also important to note that A-MUD was used to detect USVs in both algorithms to  
 674 provide a fair basis for comparing the classification step in DSQ and *BootSnap* (this improved the average  
 675 detection rate of DSQ by 5%).

676 **Table 5. Comparison of DSQ and *BootSnap* performances for the supervised classification of USVs in EV\_wild and**  
 677 **EV\_lab recordings.** The values of macro F1 (which is the average of F1-score over all classes) and class-wise F1-score (F1-  
 678 score computed for each class) are presented.

| Scheme          | macro<br>F1-score (%) | Class-wise F1-score (%) |           |           |           |           |           |
|-----------------|-----------------------|-------------------------|-----------|-----------|-----------|-----------|-----------|
|                 |                       | c                       | c2        | split     | FP        | rise      | ui        |
| <i>EV_wild</i>  |                       |                         |           |           |           |           |           |
| DSQ             | 41                    | 0                       | 44        | 56        | 50        | 82        | 12        |
| <i>BootSnap</i> | <b>67</b>             | <b>32</b>               | <b>58</b> | <b>58</b> | <b>93</b> | <b>92</b> | <b>66</b> |
| <i>EV_lab</i>   |                       |                         |           |           |           |           |           |
| DSQ             | 49                    | 24                      | 43        | 74        | 66        | <b>69</b> | 16        |
| <i>BootSnap</i> | <b>64</b>             | <b>38</b>               | <b>93</b> | <b>84</b> | <b>77</b> | 61        | <b>28</b> |

679  
 680 As expected, *BootSnap* and DSQ performed better for the types of mice used for training the  
 681 models (wild and lab mice, respectively; Table 5). DSQ had an F1-score of 41% for wild mice and 49%  
 682 for lab mice. Similarly, *BootSnap* had an F1-score of 67% and 64% for wild and lab mice, respectively.  
 683 Nevertheless, *BootSnap* outperformed DSQ for both types of mice overall. In terms of class-wise  
 684 performance, *BootSnap* performed better in nearly all the classes ('c', 'c2', 'split', 'FP', and 'ui', with  
 685 higher F1-scores of 32%, 14%, 2%, 43%, and 54 % for the EV\_wild and higher F1-scores of 14%, 50%,  
 686 10%, 11%, and 12 % for the EV\_lab). DSQ outperformed *BootSnap* for the EV\_lab for one class, 'rise'.  
 687 The reason for the superior performance of *BootSnap* in classifying 'c2' and 'split' classes in EV\_lab  
 688 over EV\_wild is probably explained by the jumps that in EV\_lab are stronger than in the wild mice data.

689  
 690 Once again, an important point for developing and assessing the performance of a classifier is its  
 691 generalizability, i.e., how well the model works when classifying data not used for the model  
 692 development. In reviewing the above results, we observed that both DSQ and *BootSnap* had a relatively  
 693 poor performance in the classification of the classes 'ui' and 'c'. Further examinations showed that the  
 694 decline in their performance in these classes was due to the significant difference in the distribution of  
 695 new data with their training data. This difference is better seen in the three-dimensional t-SNE (Maaten  
 696 et al., 2008) representation (using the initial dimension of 40, the perplexity of 50, and the number of  
 697 iteration of 2000) shown in Figure 9. The F1-scores of 'ui' and 'c' classes were very low for both  
 698 *BootSnap* and DSQ for lab and wild mice, still, *BootSnap* outperformed DSQ. In the class 'rise', the  
 USVs of wild and laboratory mice have overlapped distribution, which was in contrast to the classes 'ui'

699 and ‘c’ (Figure 8c). Thus, the performance of both models for this class was much better than for other  
700 classes.

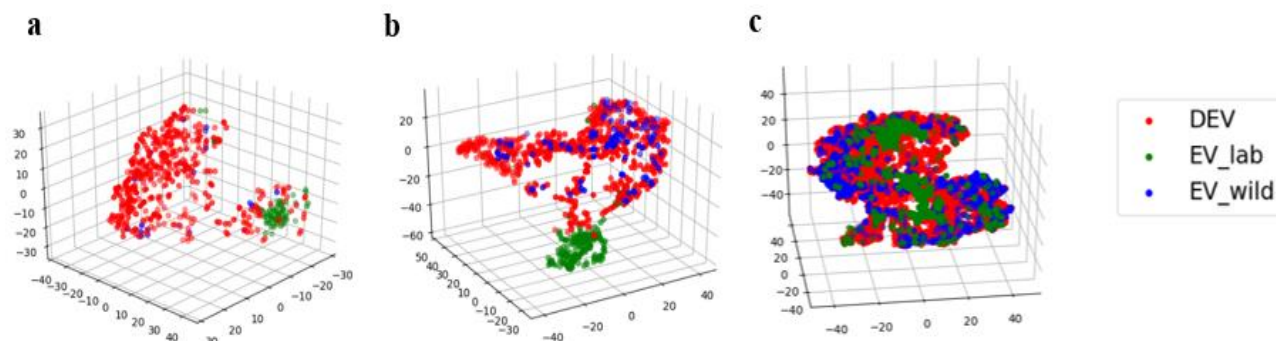

701

702 **Figure 9. Scatterplots of USVs from three classes comparing different types of data and mice.** 3-dimensional t-distributed  
703 stochastic neighbor embedding (t-SNE) representation of the classes (a) ‘c’, (b) ‘ui’, and (c) ‘rise’. Colors indicate the dataset  
704 to which USVs belong.

705

### 706 3.6. Inter-observer reliability

707 When calculating the inter-observer reliability (IOR), excluding ‘missed’ segments, for the DEV  
708 dataset (n = 630 segments from 5 soundfiles), we found ca. 80% agreement between two independent  
709 observers and ca. 84% agreement for the EV dataset (n = 578 segments from 5 soundfiles), when  
710 including all classes (Table 6). The removal of the ‘missed’ segments from all class combinations has a  
711 larger effect on IOR in the DEV data than the EV data. This is probably because most of the USVs in the  
712 DEV dataset have low-SNR or they are fainter compared to USVs in the EV dataset, since the EV dataset  
713 includes the EV\_lab files which usually have a high-SNR (see Table 3 in Supplementary materials). So,  
714 in the EV data, the probability of error in the detection tool and observer is less due to having louder  
715 USVs.

716 Excluding the “us” and “s” USVs increased the IOR to 84% for the DEV data (9% of the segments  
717 excluded) and to 86% for the EV data (3.6% of the segments excluded), respectively. A detailed  
718 comparison of the manual classification by the two observers (Figure 6 in Supplementary materials)  
719 showed that the USV types “us”, “s”, “up”, “u”, “h”, “c”, “c3”, “c2”, and “ui” in the DEV dataset and  
720 “us”, “s”, “up”, “h”, “c4”, “c5”, and “ui” in the EV dataset accounted for the highest disagreement  
721 between observers. The disagreement for the type “us” was likely due to detection error since “us” USVs  
722 have <5 ms duration and might not be detected by another observer in noisy recordings. If there is a  
723 disagreement in the length of USVs (due to faint USVs or background noise) between observers, an “us”  
724 might be classified as “s” and “s” USV might be classified as “d” or “us”. We observed a low number of  
725 “s” and “us” types when analyzing the EV dataset especially within the recordings from laboratory mice

726 (9% of “us” and “s” in the DEV dataset compared to 3.6% in the EV dataset). Additionally, there can be  
 727 disagreement between the USV types “up” and “ui”. This error is likely to occur due to the threshold of  
 728 5kHz to measure the frequency modulation and used to distinguish between “up” and “ui”. USVs with  
 729 upward frequency modulation of >5 kHz (“up”) often ends with a slight downward frequency  
 730 modulation, which can be close to 5 kHz. USVs often have a lower amplitude at the start or the end of  
 731 the vocalization, and sometimes it can be difficult to measure the exact frequency modulation in a  
 732 spectrogram. In summary the main misclassifications are between 1) us and s, 2) c3 and h, 3) c3, c2, and  
 733 c, 4) c, ui, u, and up, and 5) d and f. Usually, the fuzzy transition between the types is the main problem  
 734 in manual classification. Thus, although USV syllables are discrete, they are not all very discrete,  
 735 especially when the USVs are classified into a large number of classes (e.g., more than 5 according to  
 736 Table 6). These reflect that the main difficulties of *BootSnap* and manual classification are similar.

737 In our datasets, errors in manual classification were mainly due to (i) high background noise, (ii)  
 738 duration or frequency thresholds used to define USV types, (iii) low or high amplitude of USVs (iv), and  
 739 “noisy” vocalizations with many frequency jumps emitted by laboratory mice. The disagreement in  
 740 manual classification of certain syllable types highlights the importance of finding a biologically relevant  
 741 number of different USV classes, which can be reliably differentiated with low error rates by different  
 742 observers.

743 **Table 6. Interobserver reliability for the subsets of DEV and EV datasets.** IOR values (in percentage) are given for  
 744 different combinations of classes. Two IOR values are presented for each combination of classes: IOR including ‘missed’  
 745 segments / IOR excluding ‘missed’ segments.  
 746

| Interobserver reliability in various combinations of classes |             |                           |             |             |             |           |             |             |
|--------------------------------------------------------------|-------------|---------------------------|-------------|-------------|-------------|-----------|-------------|-------------|
| Dataset                                                      | Original    | Excluding<br>'s' and 'us' | 12 classes  | 11 classes  | 6 classes   | 5 classes | 3 classes   | 2 classes   |
| DEV                                                          | 79.5 / 85.6 | 83.6 / 87.4               | 79.5 / 85.6 | 80.6 / 86.8 | 83.8 / 90.2 | 89.2 / 96 | 89.2 / 96   | 92.4 / 99.5 |
| EV                                                           | 84 / 85.7   | 85.6 / 86.4               | 88.7 / 90.5 | 88.9 / 90.6 | 90.1 / 92   | 93.2 / 95 | 94.6 / 96.5 | 97.9 / 99.8 |

747

748 **Table 7. F1-score of the DEV\_test and subsets of DEV (DEV\_IOR) and EV datasets (EV\_IOR) for IOR calculation.**  
 749 F1-score values (in percentage) are given for different combinations of classes. The numbers provided for DEV\_test is the  
 750 same as the numbers in Table 4. They are presented here again for easier comparison. Since we do not have ‘missed’ segments  
 751 in the DEV\_test data, these segments are removed when calculating the F1 score of DEV\_IOR and EV\_IOR datasets.

| Setting  | F1-score in various combinations of classes |          |          |          |          |          |
|----------|---------------------------------------------|----------|----------|----------|----------|----------|
|          | 12                                          | 11       | 6        | 5        | 3        | 2        |
| DEV_test | 76.7±1.7                                    | 81.1±1.6 | 86.7±1.9 | 86.5±2.2 | 95.4±0.6 | 97.1±0.4 |
| DEV_IOR  | 74.8                                        | 78.7     | 82.8     | 81.3     | 90       | 99.2     |
| EV_IOR   | 82.8                                        | 83.9     | 89.7     | 84.2     | 97       | 99.6     |

752

753

754

755

756

757

758

759

760

Similar to the *BootSnap* F1-score, the IOR (Table 6) and F1-score (Table 7) of IOR data improved as we pooled the classes into fewer groups. For example, the IOR improved from 6 to 5 classes classification in the DEV (from 84% to 89%) and EV (from 90% to 93%) datasets. The improved IOR to 89% (DEV) and 94% (EV) after pooling all USVs with or without frequency jumps suggests that potential classification method that is more reliable between observers compared to a classification using  $\geq 12$  USV types. Additionally, manual classification showed an agreement of 92% (DEV) and 98% (EV) when distinguishing between USVs and false positive segments. The IOR increased to 99.5% (DEV) and 99.8% (EV) when excluding ‘missed’ segments.

761

762

763

764

765

Table 7 shows that in nearly all combinations of classes, F1-score of DEV\_test data (calculated between ground truth and *BootSnap* output) is similar to the F1-score of EV\_IOR and DEV\_IOR datasets. F1-score of EV\_IOR and DEV\_IOR datasets is calculated between two observers’ labels. It can be concluded that the value of F1-score generally increases with the pooling the classes, and *BootSnap* classifies USVs with approximately equal accuracy as humans.

766

767

768

769

770

### 3.7. Comparing *BootSnap* and DSQ: sensitivity to new classes

One of the main performance factors of a classifier is how the classifier deals with classes for which it was not trained. The DEV data does not contain samples from two classes, ‘c4’ and ‘c5’. Therefore, to address this issue, we analyzed the performance of DSQ and *BootSnap* focusing on these two classes, which were present in EV\_wild data.

771

772

773

774

775

776

777

778

779

The results show that *BootSnap* assigned 68% and 32% of the members of these two classes to the classes ‘c2’ and ‘c3’, respectively. It is noteworthy that both ‘c2’ and ‘c3’ classes represent jump-included USVs, which is also a prominent feature of the classes ‘c4’ and ‘c5’. DSQ assigned 3%, 13%, 46%, 3%, and 35% of the members of the classes ‘c4’ and ‘c5’ to the classes ‘c’, ‘c2’, ‘c3’, ‘rise’, and ‘ui’, respectively. Although the class ‘ui’ is relatively similar to the ‘c4’ and ‘c5’ classes based on visual inspection (see Figure 7 in Supplementary materials), the difference is that there is no jump in the class ‘ui’ to which DSQ incorrectly assigned a significant number of classes ‘c4’ and ‘c5’. Thus, we conclude that *BootSnap* uses a measure of similarity more fitted to USVs than DSQ, assigning new class samples to the most similar classes in the training data.

780

## 4. DISCUSSION AND CONCLUSIONS

781

### 4.1. Comparing USV detection tools

782 Our first aim was to compare the performance of four USV detection tools with each other and the ground  
783 truth (manual detection), as the detection is an important first step for classification and other analyses  
784 of USVs. Compared to previous studies, our ground truth for comparison consisted of 40 times more  
785 samples (i.e., 4000 vs 100 in DSQ), and therefore, our results should be much more robust. Moreover,  
786 we evaluated USV detection using wild mice, as well as laboratory mice, and we also compared USVs  
787 recorded on the noisy background (DEV\_1 and EV\_lab\_1 signals) and having faint (EV\_wild\_1)  
788 elements. We found that A-MUD detected the largest number of actual USVs (TPRs were all >97% with  
789 its *default* parameters), and USVSEG had a similar performance (TPRs were all >94% using the adaptive  
790 optimal parameters). These two tools were better at detecting USVs from recordings with low-SNR,  
791 though faint USVs were only a problem for MUPET. USVSEG had a somewhat higher TPR for  
792 laboratory mice (99%) than wild mice (94%), and this is likely because USVSEG was primarily  
793 developed based on recordings of laboratory mice. A-MUD was parameterized using recordings of wild  
794 mice, though it still had high TPRs for both types of data, indicating that it is more generalizable than  
795 USVSEG. DSQ and MUPET had the lowest mean TPRs (94% and 89 % respectively). USVSEG had the  
796 lowest rates of false positives, though all four methods had comparable mean FPRs (i.e., between 8% –  
797 13%). For wild mice, USVSEG underestimated more the duration of USVs compared to A-MUD (with  
798 the mean bias of -3.81 vs. -0.39, respectively). In laboratory mice, A-MUD overestimated more calls  
799 compared to USVSEG, although both methods suffer from significant overestimation of the duration of  
800 USVs.

801 We compared how USVSEG and A-MUD detect USVs to better understand how these methods  
802 differ. USVSEG detects USVs using the following steps:

803 (1) it calculates spectrograms using the multitaper method, which smooths the spectrogram and  
804 reduces background noises;

805 (2) it flattens the spectrogram using cepstral filtering, which is performed by replacing the first  
806 three cepstral coefficients to zero and subtracting the median of the spectrogram (flattening eliminates  
807 impulse and constant background noises); and

808 (3) it estimates the level of background noise to make a threshold for the resulting spectrogram.

809 In contrast, A-MUD (version 3.2) detects USVs using the following steps:

810 (1) it applies an exponential mean to the spectrograms to reduce the noise contribution;

811 (2) it estimates the envelope of the spectrograms using 6-8 cepstral DCT coefficients;

812 (3) it computes the segmentation parameters, which are the amplitudes (m1-m3) and frequencies  
813 (f1-f3) of the three highest peaks in the spectrum for each time position; and

814 (4) it searches for a segment based on 4 threshold values.

815 The main reason for the higher performances of A-MUD (version 3.2) and USVSEG compared  
816 to MUPET is presumably because it uses flattening rather than spectral subtraction for denoising. Also,  
817 DSQ is based on training a supervised model based on a dataset (which also has high-SNR), which  
818 reduces its generalizability. On the other hand, it seems that the use of the multitaper method in USVSEG  
819 reduces the false positive rate compared to A-MUD. However, this approach in some cases leads to the  
820 disappearance of ultrashort USVs, the false detection of two USVs as a single USV, and it underestimates  
821 the duration of USVs in USVSEG. For these reasons, we utilized A-MUD for our subsequent USV  
822 detection.

## 823 **4.2. Comparing USV classification methods**

824 Our second aim was to develop a new method for USV detection refinement and classification  
825 and compare its performance with DSQ, and especially their relative ability to generalize to novel  
826 datasets. To develop the classifier and to overcome the uneven distribution of classes, we examined three  
827 types of resampling approaches, under-sampling, over-sampling, and bootstrapping. For each type of  
828 resampling, four model ensemble methods were applied to the outputs: the predictions of the last  
829 Snapshot ensemble; the average prediction of the last 3 Snapshot ensemble models; and a combination  
830 of the predictions of the last 3 and 5 Snapshot ensemble models by XGBMs. We found that the  
831 differences between the ensemble methods are not large if used together with bootstrapping. This result  
832 can be interpreted in such a way that the ensemble of the models derived from bootstrapped data is  
833 already compensating the uneven distribution statistically. We used bootstrapped data and the last model  
834 of snapshot ensemble as the best classifier ('BootSnap'). The classifier had the highest errors for  
835 classifying ultrashort ('us') USVs mainly due to their similarity with 's' USVs. These USVs do not differ  
836 qualitatively, they are not actually different syllables types, as they differ only in length. Another  
837 classification error was due to confusing 'c' and 'c3' syllables. The low recall in classifying "c3" syllable  
838 types was likely due to their small number used for training, and also because some members have a  
839 harmonic element, much like "h" types. The similarity in the spectrograms of 'c' to other classes as 'ui',  
840 'u' and 'up' classes lead to errors in the classification of this class. On the other hand, the model classifies  
841 classes "up", "FP", and "c2" with a recall higher than 90% and classes "ui", "u" and 'f' with a recall of  
842 more than 85%. These classes have a relatively larger number of members compared to other classes

843 ('us' and 'c3') and their spectrograms are relatively different from each other. The overall F1-score of  
844 the model increased from 76.7% to 81.1% by pooling 's' and 'us' classes, which resulted in a more robust  
845 classification.

846 We compared the performance of *BootSnap* to DSQ, which is currently the state-of-the-art  
847 classification tool. DSQ uses a 6-member syllable classification that includes 'rise', 'split', 'ui', 'c2',  
848 'FP', and 'c' types (i.e., a simpler classification approach based on 6 classes, see Table 5). USVs from  
849 wild mice as well as laboratory mice were used to evaluate the generalizability of these two classifiers.  
850 As expected, in *BootSnap* classifier, the closer the data is to the training domain, the better the overall  
851 performances. It has 85% F1-score for 6-class classification of USVs on DEV\_test data (Table 4), but  
852 about 65% F1-score for EV datasets. We found that our new classification method outperformed DSQ  
853 in nearly all aspects, including USVs of both the wild and laboratory mice (macro-F1 score of 66% vs  
854 47%). This difference in performance is mainly because the DSQ classifier was developed using high-  
855 SNR data, compromising its performance with new low-SNR recordings. In contrast, we used low-SNR  
856 data to develop our classifier and aimed to enhance its ability to generalize. We also used the Ensemble  
857 learning method, which is based on the Snapshot Ensemble and Bootstrapped input data for training the  
858 classifier. In Ensemble learning, base models are combined to prevent the final model from either  
859 overfitting or underfitting, making the model more stable and generalizable.

860 *BootSnap* also showed better performance than DSQ in assigning new class samples to the most  
861 similar classes in training data. For example, our results show that *BootSnap* assigned all instances with  
862 more than 3 jumps (similar to those not found in the training data) to similar classes with less than 3  
863 jumps. However, DSQ allocates 30% of these new samples to the class without any jumps. Our method  
864 also detects noise in new data much more accurately (F1-score of 93% vs. about 50% for EV\_wild and  
865 77% vs. 66% for EV\_lab), and thus it is more useful for low-SNR data, which is a common challenge  
866 for USVs studies – especially studies aiming to record animals under social contexts. Another advantage  
867 is that DSQ is based on MATLAB, which requires the purchase of required licenses, whereas our method  
868 is based on Python and, thus, it is free of charge.

### 869 **4.3. Inter-observer reliability (IOR)**

870 To our knowledge, this is the first time that USV detection or classification tools have been  
871 evaluated that also examined the accuracy of the ground truth used to assess machine performance.  
872 According to the inter-observer reliability (IOR) results, the agreement between two observers in DEV  
873 and EV dataset was 76% and 88%, respectively. The mentioned values are related to the classification



874 of segments into 12 classes, and, in addition to the A-MUD detections, segments which were missed by  
875 A-MUD but manually detected by one or both observers are included. A closer look at the results reveals  
876 that mislabeling members of the classes ‘us’ as ‘s’, ‘ui’ as ‘up’, and ‘c’ as ‘ui’ and to a lesser degree as  
877 ‘up’, and vice versa, is very likely. The reason for the error in these classes is their sensitivity to the  
878 threshold (based on duration or modulation frequency) that are used in their definitions. On the other  
879 hand, in class "h", due to the possibility of a faint harmonic element, incorrect labeling of these segments  
880 is very likely. Hence, part of the classification error of a classifier can be attributed to the error in the  
881 manual labeling of segments. However, the classes can be pooled to increase the amount of IOR (from  
882 80% of 12-class classification to 84% of 6-class and to 93% of 2-class classification, see DEV dataset in  
883 Table 6), as this increased the F1-score of *BootSnap* (F1-score changed from 77% of 12-class  
884 classification to 87% of 6-class and 97% of 2-class classification, see Table 4). These results suggest that  
885 the error rate will depend upon the number of classes chosen for the classification, and that *BootSnap*  
886 can classify USVs with an accuracy similar to the results obtained from human inter-observer reliability.

887 While completing the final draft of our present manuscript, a new tool, called 'Vocalmat' (Fonseca  
888 et al., 2021), was published that detects and classifies USVs into 11 categories. The Vocalmat classifier  
889 is trained on the USVs of mouse pups (5 to 15 days old) of both sexes of several inbred strains, including  
890 C57BL6/J, NZO/HILtJ (New Zealand Obese), 129S1/SvImJ, NOD/ShiLtJ (Non-obese Diabetic NOD),  
891 and PWK/PhJ (descendants from a single pair of *Mus musculus musculus*). It was developed using USVs  
892 in the frequency range of 45 kHz to 140 kHz. After contrast enhancement and applying several filters,  
893 the authors calculated the spectrogram (with the size of 227\*227) of 12,954 detected elements. Its  
894 classifier is the AlexNet model (Krizhevsky et al., 2012), which was pre-trained on the ImageNet dataset.  
895 Like other studies, this classifier was not compared with other USV tools and the results on its  
896 generalizability were not provided. We evaluated the performance of Vocalmat on its test data and found  
897 that the average class-wise accuracy is 79%, whereas *BootSnap* yielded an average class-wise accuracy  
898 of 83% for classifying DEV\_test elements into 11 classes. The differences in the performances of these  
899 tools could be due to differences in the test data used for evaluation.

#### 900 **4.4. Outlook**

901 As with existing USV models, our classification method is supervised, and so if the user wants  
902 to retrain it, manually labeled data are required. On the other hand, despite the outperformance of  
903 *BootSnap* over DSQ, *BootSnap* still has difficulties with classifying new data of a complex (with no  
904 jump), u-inverted, and 1-jump including USVs. Considering that our best model is based on the bootstrap

905 technique, naturally as the number of bootstrap iterations increases, so does the computation time. By  
906 default, 10 repetitions are considered for *BootSnap*. This means that *BootSnap* calculations will be 10  
907 times slower than similar models. Because manual labeling of data is a difficult and time-consuming  
908 task, it is important to be able to apply a model trained on a single data source on other data sources as  
909 well. So, to further improve the generalizability of a classifier, in addition to implementing the bootstrap  
910 technique, we will increase the number of samples by using more mice recordings. We expect that this  
911 approach will increase the predictive power of our classifier.

912 Finally, it is important to note that the USVs of mice have been classified by human researchers  
913 based on visual inspection of spectrograms or statistical clustering models, and it is still unclear whether  
914 mice can discriminate most types of USVs. Mice can hear high frequencies and can distinguish  
915 frequencies that differ by only 3% (de Hoz et al., 2014), but there have only been few tests to determine  
916 whether mice discriminate different types of USVs. One study found that laboratory mice can be trained  
917 to discriminate simple versus complex USVs, and they also discriminated certain variations in shape and  
918 frequency (Neilans et al., 2014). A second study found that trained mice discriminate USVs depending  
919 upon their spectro-temporal similarity, and 'classified' complex calls and up-shapes, but not u-shaped  
920 calls (Screven et al., 2019). A third study found that mice fail to discriminate between synthetic sounds  
921 with different shapes, i.e. up- vs. down-shapes (Screven et al., 2016). The shapes of these synthesized  
922 sounds were very different from mouse USVs, however, and may have lacked characteristics critical for  
923 discrimination. Thus, future studies are needed to determine whether mice can discriminate the types of  
924 USVs proposed by researchers, and these should include recordings with normal variation of syllable  
925 types within and between each category (i.e., mice should be better able to discriminate between- versus  
926 within-syllable type variation). Until such studies are conducted, USVs classified by humans or statistical  
927 models would be more accurately labeled as *putative* mouse USVs.

928 **Author contributions statement:**

929 **RA:** Conceptualization; Methodology; Software; Validation; Formal analysis; Resources; Data curation;  
930 Writing – original draft preparation; Writing – review & editing; Visualization

931 **PB:** Conceptualization; Methodology; Validation; Resources; Writing – original draft preparation;  
932 Writing – review & editing; Supervision; Project administration; Funding acquisition

933 **MAM:** Validation; Investigation; Resources; Data curation; Writing – original draft preparation; Writing  
934 – review & editing

935 **DN:** Validation; Investigation; Resources; Data curation; Writing – original draft preparation; Writing –  
936 review & editing

937 **SMZ:** Investigation; Resources; Data curation; Writing – original draft preparation; Writing – review &  
938 editing; Supervision; Project administration; Funding acquisition

939 **DJP:** Conceptualization; Resources; Data curation; Writing – original draft preparation; Writing – review  
940 & editing; Supervision; Project administration; Funding acquisition

941 MAM and DN made equal contributions. SMZ and DJP made equal contributions.

#### 942 **Acknowledgment:**

943 We would like to thank Anton Noll for making A-MUD outputs available.

#### 944 **Ethics statement of animal experiments:**

945 There were no new experiments in this study.

#### 946 **Competing interests:**

947 No competing interests declared.

#### 948 **Funding:**

949 This work was supported by the START-project FLAME ('Frames and Linear Operators for Acoustical  
950 Modeling and Parameter Estimation'; Y 551-N13) to PB and by a grant (FWF P 28141-B25) of the  
951 Austrian Science Foundation (<http://www.fwf.ac.at>) to DJP and SMZ.

#### 952 **Availability of Data, Software, and Research Materials:**

953 The scripts are available on our GitHub page.  
954

#### 955 **References**

- 956 Abbasi, R., Balazs, P., Noll, A., Nicolakis, D., Marconi, M. A., Zala, S. M., & Penn, D. J. (2019). *Applying convolutional*  
957 *neural networks to the analysis of mouse ultrasonic vocalizations*, DOI:[https://doi.org/10.18154/RWTH-CONV-](https://doi.org/10.18154/RWTH-CONV-239263)  
958 [239263](https://doi.org/10.18154/RWTH-CONV-239263).
- 959 Anguita, D., Boni, A., & Ridella, S. (2000). Evaluating the generalization ability of support vector machines through the  
960 bootstrap. *Neural Processing Letters*, 11(1), 51-58, DOI:<https://doi.org/10.1023/A:1009636300083>.
- 961 Balazs, P., Holighaus, N., Necciari, T., & Stoeva, D. (2017). Frame theory for signal processing in psychoacoustics *Excursions*  
962 *in Harmonic Analysis, Volume 5* (pp. 225-268): Springer, DOI:[https://doi.org/10.1007/978-3-319-54711-4\\_10](https://doi.org/10.1007/978-3-319-54711-4_10).
- 963 Balazs, P., Noll, A., Deutsch, W. A., & Laback, B. (2000). Concept of the integrated signal analysis software system STx.  
964 *Jahrestagung der Österreichischen Physikalischen Gesellschaft*.
- 965 Batista, G. E., Prati, R. C., & Monard, M. C. (2004). A study of the behavior of several methods for balancing machine  
966 learning training data. *ACM SIGKDD explorations newsletter*, 6(1), 20-29,  
967 DOI:<https://doi.org/10.1145/1007730.1007735>.
- 968 Binder, M., Nolan, S. O., & Lugo, J. N. (2020). A comparison of the Avisoft (v. 5.2) and MATLAB Mouse Song Analyzer  
969 (v. 1.3) vocalization analysis systems in C57BL/6, Fmr1-FVB, 129, NS-Pten-FVB, and 129 mice. *Journal of*  
970 *Neuroscience Methods*, 108913, DOI:<https://doi.org/10.1016/j.jneumeth.2020.108913>.
- 971 Binder, M. S., Hernandez-Zegada, C. J., Potter, C. T., Nolan, S. O., & Lugo, J. N. (2018). A comparison of the Avisoft (5.2)  
972 and Ultravox (2.0) recording systems: Implications for early-life communication and vocalization research. *Journal*  
973 *of Neuroscience Methods*, 309, 6-12, DOI:<https://doi.org/10.1016/j.jneumeth.2018.08.015>.
- 974 Box, G., & Jenkins, G. (1970). Time Series Analysis: Forecasting and Control. *Halden-Day, San Francisco*.
- 975 Brandes, T. S. (2008). Automated sound recording and analysis techniques for bird surveys and conservation. *Bird*  
976 *Conservation International*, 18(S1), S163-S173, DOI:<https://doi.org/10.1017/S0959270908000415>.
- 977 Breiman, L. (2001). Random forests. *Machine learning*, 45(1), 5-32.
- 978 Brudzynski, S. M. (2018). *Handbook of Ultrasonic Vocalization: A Window Into the Emotional Brain* (Vol. 25): Academic  
979 Press.

- 980 Burkett, Z. D., Day, N. F., Peñagarikano, O., Geschwind, D. H., & White, S. A. (2015). VoICE: A semi-automated pipeline  
981 for standardizing vocal analysis across models. *Scientific reports*, 5(1), 1-15, DOI:<https://doi.org/10.1038/srep10237>.
- 982 Chabout, J., Jones-Macopson, J., & Jarvis, E. D. (2017). Eliciting and analyzing male mouse ultrasonic vocalization (USV)  
983 songs. *Journal of visualized experiments: JoVE*(123), DOI:<https://doi.org/10.3791/54137>.
- 984 Chabout, J., Sarkar, A., Dunson, D. B., & Jarvis, E. D. (2015). Male mice song syntax depends on social contexts and  
985 influences female preferences. *Frontiers in behavioral neuroscience*, 9, 76,  
986 DOI:<https://doi.org/10.3389/fnbeh.2015.00076>.
- 987 Chen, C.-P., Bilmes, J. A., & Kirchhoff, K. (2002). *Low-resource noise-robust feature post-processing on Aurora 2.0*. Paper  
988 presented at the Seventh International Conference on Spoken Language Processing.
- 989 Chen, C., Bai, W., Davies, R. H., Bhuvva, A. N., Manisty, C. H., Augusto, J. B., Moon, J. C., Aung, N., Lee, A. M., & Sanghvi,  
990 M. M. (2020). Improving the generalizability of convolutional neural network-based segmentation on CMR images.  
991 *Frontiers in cardiovascular medicine*, 7, 105, DOI:<https://doi.org/10.3389/fcvm.2020.00105>.
- 992 Chen, T., & Guestrin, C. (2016). *Xgboost: A scalable tree boosting system*. Paper presented at the Proceedings of the 22nd  
993 acm sigkdd international conference on knowledge discovery and data mining,  
994 DOI:<https://doi.org/10.1145/2939672.2939785>.
- 995 Chen, Y., Jiang, H., Li, C., Jia, X., & Ghamisi, P. (2016). Deep feature extraction and classification of hyperspectral images  
996 based on convolutional neural networks. *IEEE Transactions on Geoscience and Remote Sensing*, 54(10), 6232-6251,  
997 DOI:<https://doi.org/10.1109/TGRS.2016.2584107>.
- 998 Clevert, D.-A., Unterthiner, T., & Hochreiter, S. (2015). Fast and accurate deep network learning by exponential linear units  
999 (elus). *arXiv preprint arXiv:1512.07289*.
- 1000 Coffey, K. R., Marx, R. G., & Neumaier, J. F. (2019). DeepSqueak: a deep learning-based system for detection and analysis  
1001 of ultrasonic vocalizations. *Neuropsychopharmacology*, 44(5), 859-868, DOI:<https://doi.org/10.1038/s41386-018-0303-6>.
- 1002
- 1003 De Boer, E., & De Jongh, H. (1978). On cochlear encoding: Potentialities and limitations of the reverse-correlation technique.  
1004 *The Journal of the Acoustical Society of America*, 63(1), 115-135, DOI:<https://doi.org/10.1121/1.381704>.
- 1005 de Hoz, L., & Nelken, I. (2014). Frequency tuning in the behaving mouse: different bandwidths for discrimination and  
1006 generalization. *PloS one*, 9(3), e91676, DOI:<https://doi.org/10.1371/journal.pone.0091676>.
- 1007 Dou, X., Shirahata, S., & Sugimoto, H. (2018). Functional clustering of mouse ultrasonic vocalization data. *PloS one*, 13(5),  
1008 e0196834, DOI:<https://doi.org/10.1371/journal.pone.0196834>.
- 1009 Ehret, G. (2018). Characteristics of vocalization in adult mice *Handbook of behavioral neuroscience* (Vol. 25, pp. 187-195):  
1010 Elsevier, DOI:<https://doi.org/10.1016/B978-0-12-809600-0.00018-4>.
- 1011 Févotte, C., & Idier, J. (2011). Algorithms for nonnegative matrix factorization with the  $\beta$ -divergence. *Neural computation*,  
1012 23(9), 2421-2456, DOI:[https://doi.org/10.1162/NECO\\_a\\_00168](https://doi.org/10.1162/NECO_a_00168).
- 1013 Fischer, J., & Hammerschmidt, K. (2011). Ultrasonic vocalizations in mouse models for speech and socio-cognitive disorders:  
1014 insights into the evolution of vocal communication. *Genes, Brain and Behavior*, 10(1), 17-27,  
1015 DOI:<https://doi.org/10.1111/j.1601-183X.2010.00610.x>.
- 1016 Fletcher, H. (1940). Auditory patterns. *Reviews of modern physics*, 12(1), 47,  
1017 DOI:<https://doi.org/10.1103/RevModPhys.12.47>.
- 1018 Fonseca, A. H., Santana, G. M., Ortiz, G. M. B., Bampi, S., & Dietrich, M. O. (2021). Analysis of ultrasonic vocalizations  
1019 from mice using computer vision and machine learning. *Elife*, 10, e59161, DOI:<https://doi.org/10.7554/eLife.59161>.
- 1020 Fukushima, K. (1980). A self-organizing neural network model for a mechanism of pattern recognition unaffected by shift in  
1021 position. *Biol. Cybern.*, 36, 193-202, DOI:<https://doi.org/10.1007/BF00344251>.
- 1022 Goodfellow, I., Bengio, Y., Courville, A., & Bengio, Y. (2016). *Deep learning* (Vol. 1): MIT press Cambridge.
- 1023 Goudbeek, M., Cutler, A., & Smits, R. (2008). Supervised and unsupervised learning of multidimensionally varying non-  
1024 native speech categories. *Speech communication*, 50(2), 109-125,  
1025 DOI:<https://doi.org/10.1016/j.specom.2007.07.003>.
- 1026 Guerra, L., McGarry, L. M., Robles, V., Bielza, C., Larranaga, P., & Yuste, R. (2011). Comparison between supervised and  
1027 unsupervised classifications of neuronal cell types: a case study. *Developmental neurobiology*, 71(1), 71-82,  
1028 DOI:<https://doi.org/10.1002/dneu.20809>.
- 1029 Hanson, J. L., & Hurley, L. M. (2012). Female presence and estrous state influence mouse ultrasonic courtship vocalizations.  
1030 *PloS one*, 7(7), e40782, DOI:<https://doi.org/10.1371/journal.pone.0040782>.
- 1031 Hastie, T., Tibshirani, R., & Friedman, J. (2009). *The Elements of Statistical Learning: Data Mining, Inference and Prediction*.  
1032 (2 ed., pp. 485-585): Springer.
- 1033 He, K., Zhang, X., Ren, S., & Sun, J. (2015). *Delving deep into rectifiers: Surpassing human-level performance on imagenet*  
1034 *classification*. Paper presented at the Proceedings of the IEEE international conference on computer vision,  
1035 DOI:<https://doi.org/10.1109/ICCV.2015.123>.

- 1036 Heckman, J., McGuinness, B., Celikel, T., & Englitz, B. (2016). Determinants of the mouse ultrasonic vocal structure and  
1037 repertoire. *Neuroscience & Biobehavioral Reviews*, 65, 313-325,  
1038 DOI:<https://doi.org/10.1016/j.neubiorev.2016.03.029>.
- 1039 Hoerl, A. E., & Kennard, R. W. (1970). Ridge regression: Biased estimation for nonorthogonal problems. *Technometrics*,  
1040 12(1), 55-67, DOI:<https://doi.org/10.1080/00401706.1970.10488634>.
- 1041 Hoffmann, F., Musolf, K., & Penn, D. J. (2012). Ultrasonic courtship vocalizations in wild house mice: spectrographic  
1042 analyses. *Journal of ethology*, 30(1), 173-180, DOI:<https://doi.org/10.1007/s10164-011-0312-y>.
- 1043 Huang, G., Li, Y., Pleiss, G., Liu, Z., Hopcroft, J. E., & Weinberger, K. Q. (2017). Snapshot ensembles: Train 1, get m for  
1044 free. *arXiv preprint arXiv:00109*.
- 1045 Huang, T., Yang, G., & Tang, G. (1979). A fast two-dimensional median filtering algorithm. *IEEE Transactions on Acoustics,*  
1046 *Speech, and Signal Processing*, 27(1), 13-18, DOI:<https://doi.org/10.1109/TASSP.1979.1163188>.
- 1047 Ioffe, S., & Szegedy, C. (2015). *Batch Normalization: Accelerating Deep Network Training by Reducing Internal Covariate*  
1048 *Shift*. Paper presented at the International Conference on Machine Learning.
- 1049 Kanungo, T., Mount, D. M., Netanyahu, N. S., Piatko, C. D., Silverman, R., & Wu, A. Y. (2002). An efficient k-means  
1050 clustering algorithm: Analysis and implementation. *IEEE transactions on pattern analysis and machine intelligence*,  
1051 24(7), 881-892, DOI:<https://doi.org/10.1109/TPAMI.2002.1017616>.
- 1052 Kasess, C. H., Noll, A., Majdak, P., & Waubke, H. (2013). Effect of train type on annoyance and acoustic features of the  
1053 rolling noise. *The Journal of the Acoustical Society of America*, 134(2), 1071-1081,  
1054 DOI:<https://doi.org/10.1121/1.4812771>.
- 1055 Keras. Retrieved from <https://keras.io/>
- 1056 King, G., & Zeng, L. (2001). Logistic regression in rare events data. *Political analysis*, 9(2), 137-163.
- 1057 Krizhevsky, A., Sutskever, I., & Hinton, G. E. (2012). *Imagenet classification with deep convolutional neural networks*. Paper  
1058 presented at the Advances in neural information processing systems.
- 1059 LeCun, Y., Bottou, L., Bengio, Y., & Haffner, P. (1998). Gradient-based learning applied to document recognition.  
1060 *Proceedings of the IEEE*, 86(11), 2278-2324, DOI:<https://doi.org/10.1016/10.1109/5.726791>.
- 1061 Lee, D. D., & Seung, H. S. (1999). Learning the parts of objects by non-negative matrix factorization. *Nature*, 401(6755),  
1062 788-791, DOI:<https://doi.org/10.1038/44565>.
- 1063 Maaten, L. v. d., & Hinton, G. (2008). Visualizing data using t-SNE. *Journal of machine learning research*, 9(Nov), 2579-  
1064 2605.
- 1065 Macmillan, N. A., & Creelman, C. D. (2004). *Detection theory: A user's guide* (2 ed.): Psychology press,  
1066 DOI:<https://doi.org/10.4324/9781410611147>.
- 1067 Marconi, M. A., Nicolakis, D., Abbasi, R., Penn, D. J., & Zala, S. M. (2020). Ultrasonic courtship vocalizations of male house  
1068 mice contain distinct individual signatures. *Animal Behaviour*, DOI:<https://doi.org/10.1016/j.anbehav.2020.09.006>.
- 1069 MouseTube. Retrieved from <https://mousetube.pasteur.fr/>
- 1070 Murphy, K. P. (2012). *Machine learning: a probabilistic perspective*: MIT press.
- 1071 Musolf, K., Meindl, S., Larsen, A. L., Kalcounis-Rueppell, M. C., & Penn, D. J. (2015). Ultrasonic vocalizations of male  
1072 mice differ among species and females show assortative preferences for male calls. *PloS one*, 10(8),  
1073 DOI:<https://doi.org/10.1371/journal.pone.0134123>.
- 1074 Neilans, E. G., Holfoth, D. P., Radziwon, K. E., Portfors, C. V., & Dent, M. L. (2014). Discrimination of ultrasonic  
1075 vocalizations by CBA/CaJ mice (*Mus musculus*) is related to spectrotemporal dissimilarity of vocalizations. *PloS*  
1076 *one*, 9(1), e85405, DOI:<https://doi.org/10.1371/journal.pone.0085405>.
- 1077 Nesterov, Y. (1983). *A method for unconstrained convex minimization problem with the rate of convergence  $O(1/k^2)$* . Paper  
1078 presented at the Doklady an ussr.
- 1079 Nicolakis, D., Marconi, M. A., Zala, S. M., & Penn, D. J. (2020). Ultrasonic vocalizations in house mice depend upon genetic  
1080 relatedness of mating partners and correlate with subsequent reproductive success. *Frontiers in zoology*, 17, 1-19,  
1081 DOI:<https://doi.org/10.1186/s12983-020-00353-1>.
- 1082 Oppenheim, A. V., Schaffer, R., & Buck, J. (1999). *Discrete-time signal processing* (2 ed.). Upper Saddle River, NJ, USA:  
1083 Prentice Hall: Pearson Education India.
- 1084 Pan, S. J., & Yang, Q. (2009). A survey on transfer learning. *IEEE Transactions on knowledge and data engineering*, 22(10),  
1085 1345-1359, DOI:<https://doi.org/10.1109/TKDE.2009.191>.
- 1086 Premoli, M., Baggi, D., Bianchetti, M., Gnutti, A., Bondaschi, M., Mastinu, A., Migliorati, P., Signoroni, A., Leonardi, R., &  
1087 Memo, M. (2021). Automatic classification of mice vocalizations using Machine Learning techniques and  
1088 Convolutional Neural Networks. *PloS one*, 16(1), e0244636, DOI:<https://doi.org/10.1371/journal.pone.0244636>.
- 1089 Sammut, C., & Webb, G. I. (2011). *Encyclopedia of machine learning*: Springer Science & Business Media,  
1090 DOI:<https://doi.org/10.1007/978-0-387-30164-8>.
- 1091 Scattoni, M. L., Gandhi, S. U., Ricceri, L., & Crawley, J. N. (2008). Unusual repertoire of vocalizations in the BTBR T+ tf/J  
1092 mouse model of autism. *PloS one*, 3(8), e3067, DOI:<https://doi.org/10.1371/journal.pone.0003067>.

- 1093 Scherer, D., Müller, A., & Behnke, S. (2010). *Evaluation of pooling operations in convolutional architectures for object*  
1094 *recognition*. Paper presented at the International conference on artificial neural networks,  
1095 DOI:[https://doi.org/10.1007/978-3-642-15825-4\\_10](https://doi.org/10.1007/978-3-642-15825-4_10).
- 1096 Screven, L. A., & Dent, M. L. (2016). Discrimination of frequency modulated sweeps by mice. *The Journal of the Acoustical*  
1097 *Society of America*, 140(3), 1481-1487, DOI:<https://doi.org/10.1121/1.4962223>.
- 1098 Screven, L. A., & Dent, M. L. (2019). Perception of ultrasonic vocalizations by socially housed and isolated mice. *Eneuro*,  
1099 6(5), DOI:<https://doi.org/10.1523/ENEURO.0049-19.2019>.
- 1100 Slaney, M. (1998). Auditory toolbox. *Interval Research Corporation, Tech. Rep.*, 10(1998), 1194,  
1101 DOI:[https://doi.org/10.1007/978-3-642-37762-4\\_2](https://doi.org/10.1007/978-3-642-37762-4_2).
- 1102 Smith, A. A., & Kristensen, D. (2017). *Deep learning to extract laboratory mouse ultrasonic vocalizations from scalograms*.  
1103 Paper presented at the IEEE International Conference on Bioinformatics and Biomedicine (BIBM),  
1104 DOI:<https://doi.org/10.1109/BIBM.2017.8217964>.
- 1105 Srivastava, N., Hinton, G., Krizhevsky, A., Sutskever, I., & Salakhutdinov, R. (2014). Dropout: a simple way to prevent neural  
1106 networks from overfitting. *The journal of machine learning research*, 15(1), 1929-1958.
- 1107 Stevens, S. S., Volkman, J., & Newman, E. B. (1937). A scale for the measurement of the psychological magnitude pitch.  
1108 *The Journal of the Acoustical Society of America*, 8(3), 185-190, DOI:<https://doi.org/10.1121/1.1915893>.
- 1109 Sun, Y., Wong, A. K., & Kamel, M. S. (2009). Classification of imbalanced data: A review. *International journal of pattern*  
1110 *recognition and artificial intelligence*, 23(04), 687-719, DOI:<https://doi.org/10.1142/S0218001409007326>.
- 1111 Tachibana, R. O., Kanno, K., Okabe, S., Kobayashi, K. I., & Okanoya, K. (2020). USVSEG: A robust method for segmentation  
1112 of ultrasonic vocalizations in rodents. *PloS one*, 15(2), e0228907,  
1113 DOI:<https://doi.org/10.1371/journal.pone.0228907>.
- 1114 Van Segbroeck, M., Knoll, A. T., Levitt, P., & Narayanan, S. (2017). MUPET—mouse ultrasonic profile extraction: a signal  
1115 processing tool for rapid and unsupervised analysis of ultrasonic vocalizations. *Neuron*, 94(3), 465-485. e465,  
1116 DOI:<https://doi.org/10.1016/j.neuron.2017.04.005>.
- 1117 Vogel, A. P., Tsanas, A., & Scattoni, M. L. (2019). Quantifying ultrasonic mouse vocalizations using acoustic analysis in a  
1118 supervised statistical machine learning framework. *Scientific reports*, 9(1), 8100,  
1119 DOI:<https://doi.org/10.1038/s41598-019-44221-3>.
- 1120 von Merten, S., Hoier, S., Pfeifle, C., & Tautz, D. (2014). A role for ultrasonic vocalisation in social communication and  
1121 divergence of natural populations of the house mouse (*Mus musculus domesticus*). *PloS one*, 9(5), e97244,  
1122 DOI:<https://doi.org/10.1371/journal.pone.0097244>.
- 1123 Wang, H., Liang, S., Burgdorf, J., Wess, J., & Yeomans, J. (2008). Ultrasonic vocalizations induced by sex and amphetamine  
1124 in M2, M4, M5 muscarinic and D2 dopamine receptor knockout mice. *PloS one*, 3(4), e1893,  
1125 DOI:<https://doi.org/10.1371/journal.pone.0001893>.
- 1126 Wiley, R. H. (1983). The evolution of communication: information and manipulation. *Animal behaviour*, 2(494), 156-189.
- 1127 Wu, X., & Zhu, X. (2008). Mining with noise knowledge: error-aware data mining. *IEEE Transactions on Systems, Man, and*  
1128 *Cybernetics-Part A: Systems and Humans*, 38(4), 917-932, DOI:<https://doi.org/10.1109/CIS.2007.7>.
- 1129 Yan, Y., Chen, M., Shyu, M.-L., & Chen, S.-C. (2015). *Deep learning for imbalanced multimedia data classification*. Paper  
1130 presented at the IEEE international symposium on multimedia (ISM).
- 1131 Zala, S. M., Nicolakis, D., Marconi, M. A., Noll, A., Ruf, T., Balazs, P., & Penn, D. J. (2020). Primed to vocalize: Wild-  
1132 derived male house mice increase vocalization rate and diversity after a previous encounter with a female. *PloS one*,  
1133 15(12), e0242959, DOI:<https://doi.org/10.1371/journal.pone.0242959>.
- 1134 Zala, S. M., Reitschmidt, D., Noll, A., Balazs, P., & Penn, D. J. (2017a). Automatic mouse ultrasound detector (A-MUD): A  
1135 new tool for processing rodent vocalizations. *PloS one*, 12(7), e0181200,  
1136 DOI:<https://doi.org/10.1371/journal.pone.0181200>.
- 1137 Zala, S. M., Reitschmidt, D., Noll, A., Balazs, P., & Penn, D. J. (2017b). Sex-dependent modulation of ultrasonic vocalizations  
1138 in house mice (*Mus musculus musculus*). *PloS one*, 12(12), e0188647,  
1139 DOI:<https://doi.org/10.1371/journal.pone.0188647>.
- 1140 Zhou, Z.-H. (2012). *Ensemble methods: foundations and algorithms*: CRC press.
- 1141 Zwicker, E. (1961). Subdivision of the audible frequency range into critical bands (Frequenzgruppen). *The Journal of the*  
1142 *Acoustical Society of America*, 33(2), 248-248.
- 1143

## 1144 **Supplementary materials**

### 1145 **1. Data**

#### 1146 **1.1. Subjects**

1147 The subjects were adult wild-derived house mice (*Mus musculus musculus*), F1, F2 or F3 descendants of  
1148 wild-caught mice trapped at the Konrad Lorenz Institute of Ethology, Vienna, Austria (48°12'38" N,  
1149 16°16'54"E). We used wild-derived rather than wild-caught mice to control for age and rearing  
1150 conditions. Mice were weaned at 21d and kept in mixed-sex groups with  $\leq 4$  siblings per cage until the  
1151 age of 5 weeks (35d). Henceforth, adult males were housed individually to prevent fighting, and females  
1152 were housed in sister-pairs whenever possible. The mice were housed in standard cages with bedding,  
1153 nesting material, a nest box, and a cardboard roll. Food and water were provided *ad libitum*. Housing  
1154 facilities were kept in standard conditions ( $22 \pm 2$  °C and a 12:12 h white light: red light cycle, lights off  
1155 at 15:00). All recordings were conducted after 15:00 when the mice are most active. We also used  
1156 recordings of laboratory mice (strain B6D2F1/J) from MouseTube (Chabout et al. (2015)).

#### 1157 **1.2. Datasets**

1158 Our analyses were conducted using 169 sound files of 48 mice from four different datasets which were  
1159 recorded in three different contexts or retrieved from MouseTube, respectively. These recordings were  
1160 either used for development (DEV) or evaluation (EV) of the new method.

1161 The development (DEV) was conducted using sound files of 44 individual mice from two  
1162 different datasets and experiments. The first dataset in the present study consisted of 14 recordings of 10  
1163 min duration (each) from F1 mice (subjects:  $n = 11$  males and 3 females; mean  $\pm$  SD age:  $204 \pm 17$  d;  
1164 stimulus females:  $n = 11$  and age:  $181 \pm 15$  d), which had been socially primed by a short direct interaction  
1165 with a female 1d before the recordings ( $n = 10$  priming females, mean  $\pm$  SD age:  $184 \pm 16$  d) (Zala et al.,  
1166 2017b); sex differences reported in (Zala et al., 2017b); results of priming effects reported in Zala et al.  
1167 (2020)). The second dataset consisted of 10 min recordings of 30 wild-derived (F2) male mice (mean $\pm$   
1168 SD age:  $220 \pm 25$  d;  $n = 30$  males; and  $217 \pm 30$  d,  $n = 60$  females) recorded twice over two consecutive  
1169 days (Zala et al, unpublished data). The dataset included 150 sound files from 30 mice recorded over 2  
1170 days: 100 sound files of 1 min duration (10 sound files x 5 mice x 2 days = 100 files), due to setting  
1171 adjustments, and 50 files of 10 min duration (1 sound files x 25 mice x 2 days = 50 files).

1172 The evaluation (EV) was conducted using 5 arbitrarily selected files from the third and fourth  
1173 datasets. The third dataset consisted of a subset ( $n=3$  soundfiles of 5 min duration) from recordings of  
1174 wild-derived mice during stimulation with a female odor stimulus (Marconi et al. (2020)). USVs were  
1175 recorded from adult males (F3, generation,  $n = 2$  males; mean  $\pm$  SD age:  $355 \pm 65$  d) recorded three times

1176 over three consecutive weeks (see below). The fourth dataset consisted of 2 arbitrarily selected sound  
1177 files of 5 min duration from 168 recordings of laboratory mice (B6D2F1 mice), which were retrieved  
1178 from MouseTube (Chabout et al. (2015)).

### 1179 **1.3. Recording procedures and apparatus (socio-sexual contexts)**

1180 The mice for the first dataset were recorded for 10 min while presented with an unfamiliar stimulus  
1181 female on the opposite side of a partition, which allowed visual and olfactory stimuli but not direct  
1182 contact (see details in (Zala et al., 2017a)). A condenser ultrasound microphone (Avisoft  
1183 Bioacoustics/CM16/CMPA) was positioned 10 cm above the subject's compartment and was connected  
1184 to an UltraSoundGate 116-200, Avisoft Bioacoustics, Germany.

1185 The mice for the second dataset were recorded for 10 min while separated from a female stimulus  
1186 by a perforated partition, and then the divider was removed allowing males to interact with the stimulus  
1187 female and they were recorded for 10 min (as described in (Nicolakis et al., 2020)). The two mice were  
1188 then separated again by the divider and recorded for an additional 5 min. An ultrasound microphone  
1189 (USG Electret Ultrasound Microphone, Avisoft Bioacoustics / Knowles FG) was positioned 10 cm above  
1190 the male's compartment and connected to an A/D-converter (UltraSoundGate 416Hb, Avisoft  
1191 Bioacoustics). This entire procedure was repeated and conducted on the next day with another unfamiliar  
1192 stimulus female (Zala et al, unpublished data.). This procedure allowed us to monitor changes in  
1193 vocalizations as courtship progressed over time, and the mice also obtained socio-sexual contact and  
1194 experience through indirect and direct interactions. We recently found that mice significantly increased  
1195 the amount of USVs (vocal performance) and the number of syllable types (vocal repertoire) after sexual  
1196 priming (Zala et al. (2020)) and after the partition was removed and they began interacting directly  
1197 (Nicolakis et al., 2020). For the second dataset of this study, we only used recordings during the first 10  
1198 min (with the divider) on both days (before and after sexual experience). All recordings for both datasets  
1199 were conducted inside a recording chamber lined with acoustic foam.

1200 The mice for the third dataset were recorded in a cage with bedding without any stimulus for 5  
1201 min (pre-stimulation phase), and then again for an additional 10 min while presented with female urine  
1202 stimulus (as described in Marconi et al. (2020)). The urine was a 60  $\mu$ l pool of thawed female urine (from  
1203 3 different unfamiliar females) presented on a cotton swab attached to the cage lid. Mice were recorded  
1204 in a separate room with no observers or other animals present. This procedure was repeated for each male  
1205 over 3 consecutive weeks, resulting in a total of 66 recordings. For USV recordings, an ultrasound  
1206 microphone (USG Electret Ultrasound Microphone, Avisoft Bioacoustics / Knowles FG) was placed 10  
1207 cm above the cage and connected to an A/D converter (UltraSoundGate 416Hb, Avisoft Bioacoustics).



1208 For each male, the recording of the 10 min stimulus presentation was saved as two separate 5 min sound  
1209 files to facilitate the processing of single sound files. The 3 arbitrarily selected 5 min sound files used for  
1210 the third dataset in this study were all recorded during the urine stimulation.

1211 The fourth dataset retrieved from MouseTube (Chabout et al. (2015)) originally included 10 min  
1212 recordings of 12 adult male mice. Mice had 5 min control recordings during the habituation period  
1213 without any stimulus inside a clean cage. Then, the males were recorded when exposed to 4 different  
1214 stimuli for 5 min: fresh urine from either females or males, awake adult female, anesthetized adult female,  
1215 and anesthetized adult male. Each male was exposed to the same stimulus on three consecutive days and  
1216 to a different stimulus over 4 consecutive weeks (as described in Chabout et al. (2015)). For the USV  
1217 recordings, ultrasound microphones (UltraSoundGate CM16/CMPA) were placed over the center of the  
1218 cage in the recording box and connected to an A/D converter (UltraSoundGate 416H, Avisoft  
1219 Bioacoustics). Sound files were available on MouseTube and for the fourth dataset of this study 2 sound  
1220 files were arbitrarily selected from the available soundfiles. All recordings for all datasets were conducted  
1221 using the RECORDER USGH software (Avisoft-RECORDER Version 4.2) with a sampling rate of 300  
1222 kHz and 16-bit format with 256 Hz FFT size for the first 3 datasets, and with a sampling rate of 250 kHz  
1223 and 16-bit format with 1024 Hz FFT size for the fourth dataset, respectively.

#### 1224 **1.4. USV detection and manual classification**

1225 For all datasets, manual USV classification was conducted in STx (Balazs et al., 2000; Kasess et al.,  
1226 2013). Spectrograms in STx were generated using a Hanning window with a range of 50dB, a frame of  
1227 4 ms and an overlap of 75% and the spectrogram displayed frequencies up to 150 kHz (Zala et al., 2017a),  
1228 Zala et al, unpublished data, (Nicolakis et al. (2020), and (Marconi et al., 2020)). USVs and other  
1229 ambiguous sounds were visually and acoustically inspected. For the first three datasets, USVs were  
1230 originally labeled according to one of the 12 (first dataset) (adapted from (Musolf et al., 2015),  
1231 (Hoffmann et al., 2012), (Hanson et al., 2012), as cited in (Zala et al., 2017a) or 15 (second and third  
1232 dataset) USV categories (Nicolakis et al. (2020), Marconi et al. (2020), and Zala et al. (2020))) and for  
1233 the fourth dataset, USVs were labeled according to 6 classes.

1234 For the DEV datasets including the first and second experiment, the USVs were classified (or  
1235 reduced) into 11 USV categories (Supplementary Table 2). The ‘uc’ and some ‘uh’ were excluded from  
1236 the classification (i.e., 10.5% of the ‘uh’ from the first dataset). However, for the first dataset 89.5% of  
1237 the ‘uh’ and for the second dataset all ‘uh’ were included in other USV categories if also their  
1238 spectrographic shape was annotated (e.g., if a USV was originally labeled as ‘uh-up’ because it was over  
1239 91 kHz and its shape was ‘up’, it was renamed to ‘up’). The ‘c4’ and ‘c5’ were rarely detected in these

1240 sound files and therefore excluded. In summary, the DEV datasets included 11 USV classes ('up', 'd',  
 1241 'c2', 'c3', 'c', 'u', 'ui', 'f', 's', 'us', and 'h') and the FPs (false positives, errors due to the low-SNR  
 1242 recordings) to reach a total of 12 classes. The EV datasets including the third and fourth datasets consisted  
 1243 of 6 classes: 'c2', 'split' (pool of 'c3', 'c4', 'c5', and 'h'), 'c', 'ui', 'rise' (pool of 'up', 'd', 'f', 's', 'us',  
 1244 and 'u'), and FP. We created the classes 'split' and 'rise' because DSQ (DeepSqueak) does not  
 1245 differentiate between individual USVs pooled in these two new classes.

1246

1247 **Supplementary Table 1. Definition of classes used in the labeling.** Note that the number of members differs before and  
 1248 after down-sampling.  $F_e$  is the end frequency,  $F_s$  is the start frequency,  $F_{max}$  is the maximum frequency, and  $F_{min}$  is the  
 1249 minimum frequency. The number of members of each class corresponds to the DEV dataset.

1250

| Classes | Definition                                                                    | Number of members |
|---------|-------------------------------------------------------------------------------|-------------------|
| FP      | Sounds falsely detected as syllables                                          | 6465              |
| UP      | Syllables with $F_e - F_s > 5kHz$                                             | 5791              |
| D       | Syllables with $F_s - F_e < 5kHz$                                             | 399               |
| F       | Syllables with $F_{max} - F_{min} < 5kHz$                                     | 1703              |
| S       | Syllables with length $< 10ms$ and $> 5ms$                                    | 389               |
| US      | Syllables with length $< 5ms$                                                 | 99                |
| U       | Syllables with $F_s - F_{min}$ and $F_e - F_{min}$ more than $5kHz$           | 398               |
| UI      | Syllables with $F_{max} - F_s$ and $F_{max} - F_e$ more than $5kHz$           | 724               |
| C       | Syllables with two or more directional changes and $F_{max} - F_{min} > 5kHz$ | 411               |
| C2      | Syllables with one jump in frequency (not time) ( $\geq 10kHz$ )              | 322               |
| C3      | Syllables with two or more jumps in frequency (not time) ( $\geq 10kHz$ )     | 92                |
| H       | Syllables with partially or complete harmonic elements                        | 165               |

1251

1252

1253 As mentioned in the main text, we compared different tools of USV detection. The following  
 1254 table presents the various parameters used to evaluate these tools.

1255

1256

1257 **Supplementary Table 2. The evaluated parameters for different USVs detection tools**

| Detection method                          | Setting number                                     |                                                    |                                                   |                                            |
|-------------------------------------------|----------------------------------------------------|----------------------------------------------------|---------------------------------------------------|--------------------------------------------|
|                                           | 1                                                  | 2                                                  | 3                                                 | 4                                          |
| <b>DSQ (Coffey et al., 2019)</b>          | All Short Calls_Network_V1                         | Mouse Call_Network_V2                              | Short Rat Call_Network_V2                         | Short Rat Call_Network_V2 with high recall |
| <b>MUPET (Van Segbroeck et al., 2017)</b> | noise-reduction=6<br>min-frequency=35kHz           | noise-reduction=5<br>min-frequency=30kHz           | ×                                                 | ×                                          |
| <b>USVSEG (Tachibana et al., 2020)</b>    | threshold=4.5<br>min-length=5 ms<br>gap min =30 ms | threshold=3.5<br>min-length=4 ms<br>gap min= 30 ms | threshold=3.5<br>min-length=4 ms<br>gap min= 5 ms | ×                                          |
| <b>A-MUD (Zala et al., 2017 a)</b>        | o1-on=12 dB,<br>o1-off=10 dB,<br>min-length=5 ms   |                                                    |                                                   |                                            |

1258  
1259  
1260

## 2. Gammatone spectrograms preparation

1261 In speech, unsupervised methods such as Non-negative matrix factorization (NMF) (Févotte et al., 2011;  
1262 Lee et al., 1999) are used to reduce the size of the spectrogram while preserving the time-frequency  
1263 information. Using NMF, the audio signal spectrogram is approximated using the weighted sum of the  
1264 basis unit functions, so that the basis unit functions and their weights are non-negative. According to  
1265 studies, the basis unit functions (or spectral bases) obtained from NMF are very similar to the human  
1266 cochlea's biological and perceptual time-frequency resolution (Fletcher, 1940), as well as perceptual  
1267 scales, such as the Mel (Stevens et al., 1937) and bark scales (Zwicker, 1961). In MUPET, NMF has  
1268 been applied on the USVs spectrogram to reduce their size along the frequency dimension. The NMF  
1269 output is the product of spectral bases matrix, which are band-pass filters and are modeled by Gammatone  
1270 band-pass function, and their weights, which are the spectral magnitude associated with the  
1271 corresponding filter. To preserve most information and reduce the computational load, the number of  
1272 spectral bases has been selected as 64. A regression is fitted to the peak frequencies of the base functions  
1273 to determine the center frequencies and bandwidths of the gammatone filters, which are as follows:

1274 
$$n = \frac{N}{1 + e^{-\gamma(f_0 - f)}} \text{ with } \gamma = \frac{2\alpha}{f_s} \quad (1)$$

1275 
$$B(n) = \frac{1}{2} (f_{n-1} - f_n) \quad (2)$$

1276

1277  $f_s$  is the sampling frequency (i.e., 300 kHz) and  $N$  corresponds to the chosen number of filters in  
 1278 the filterbank (i.e., 64).  $f_{n-1}$  and  $f_n$  are the central frequency of  $n-1^{\text{th}}$  and  $n^{\text{th}}$  Gammatone filter, and  $B$  is  
 1279 Gammatone filter bandwidth.

1280 The midpoint frequency ( $f_0$ ) and the slope variable ( $\alpha$ ) were initially obtained from the MUPET  
 1281 script ( $f_0=75$  kHz and  $\alpha=14.2$ ). We changed these two parameters (to 68 kHz and 16, respectively), so  
 1282 that all 64 Gammatone filters are generated in the range of 20 kHz to 120 kHz. The variable slope was  
 1283 set based on trial and error as 16.  $f_0$  is modified based on the mean frequency of the USVs in our data at  
 1284 which most USVs occur. For the calculation of the mean frequency of USVs, we used the frequency  
 1285 track of USVs, which was explained in the Methods section (Input images for the BootSnap). The middle  
 1286 Gammatone filter has the lowest bandwidth (i.e., 0.57 kHz) due to the high number of USVs in midpoint  
 1287 frequency. Other Gammatone filters, which are symmetrically distributed, have higher bandwidth (i.e.,  
 1288 between 0.57 kHz and 6.6 kHz) due to the smaller number of USVs in frequencies lower and higher than  
 1289 midpoint frequency.

1290 In the next step, the Gammatone filters are applied as weighted summation kernel to the STFT of  
 1291 USVs subsequently thresholded. This threshold is  $10^{-3}$ , so the maximum value between the Gammatone-  
 1292 filtered STFT pixels and the floor noise ( $10^{-3}$ ) was calculated. The output is logarithmically transformed  
 1293 and, then, it is smoothed using an Auto Regression Moving-Average (ARMA) filter (Box et al., 1970)  
 1294 with order 1.

1295 
$$\hat{C}_{td} = \begin{cases} \frac{\sum_{i=1}^M \hat{C}_{(t-1)d} + \sum_{j=0}^M C_{(t+j)d}}{2M+1} & \text{if } M < t \leq T - M \\ C_{td} & \text{otherwise} \end{cases} \quad (3)$$

1296

1297 The variable  $\hat{C}_{td}$  is the spectrum filtered by ARMA, the  $C_{td}$  is the spectrum filtered by the  
 1298 Gammatone filterbank, and  $M$  is the filter order (Van Segbroeck et al., 2017). Finally, the median filter  
 1299 is applied to remove stationary noise from  $C_{td}$ . Then zero padding is applied to produce images of USVs  
 1300 with the same size of 401\*64. 401 is the width of images, which is related to the maximum duration of  
 1301 USVs (i.e., 200 ms) and 64 is the number of Gammatone filters. Supplementary Figure 1 shows (a) the  
 1302 probability distribution of USVs Frequency track values used to update  $f_0$ , (b) the frequency response of  
 1303 32 Gammatone filters, (for simplicity 32 filters were plotted), and (c) two examples of the USVs

1304 spectrogram before (top row) and after applying the Gammatone filter and post-processing steps  
1305 discussed above (bottom row).

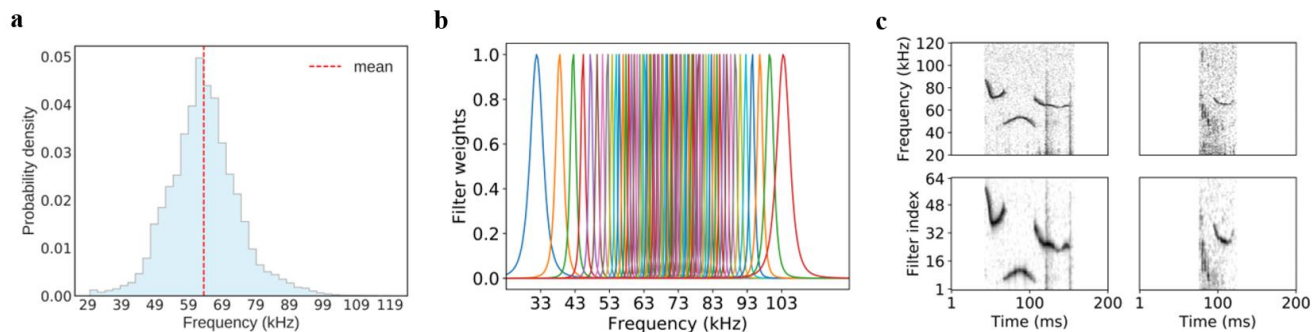

1306

1307 **Supplementary Figure 1.** (a) Distribution of USVs Frequency Track (FT) values, extracted by A-MUD. The FT values are  
1308 related to all detected syllables, omitting false positives. (b) The frequency response of 32 Gammatone filters (we have used  
1309 64 filters, but for simplicity 32 filters are plotted here) at the frequency range of 20 kHz to 120 kHz. (c) Two examples of the  
1310 USVs spectrogram before (top row) and after applying the Gammatone filter and post-processing step (bottom row). This  
1311 image shows that by applying the preprocessing steps on the spectrogram, although the size of the images is reduced from  
1312  $251 \times 401$  to  $64 \times 401$ , the important information of the USVs is not lost.

1313

### 1314 3. Classifier

1315 As mentioned in the original text, the learning rate used in this study is based on cousin learning rate,  
1316 which is defined as follows.

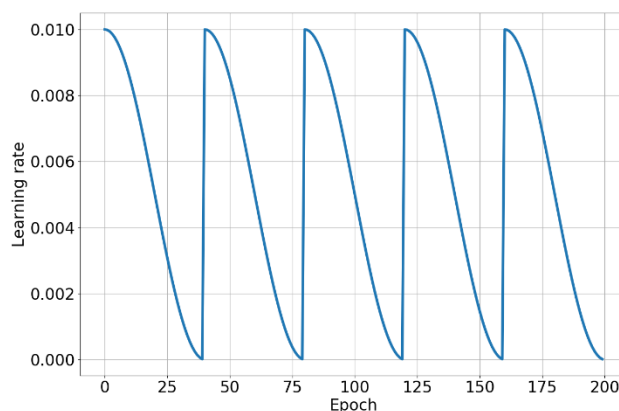

1317

1318 **Supplementary Figure 2. Schedule scheme used for the learning rate.** Using this scheme of learning rate, the final weights  
1319 of the model at every 40 epochs are the initial weights of the model in the next epoch. In this approach, the CNN weights are  
1320 saved at the minimum learning rate of each cycle, i.e., at every 40 epochs.

1321

## 1322 4. Result

1323

### 1324 4.1. Detection

1325 In the main text, we compared the performance of 4 USV detection tools (USVSEG, A-MUD, DSQ, and  
1326 MUPET) in a setting (i.e., input parameters) of which the selected parameters lead to their best  
1327 performance for the four-given data (DEV\_1, EV\_wild\_1, EV\_lab\_1, and EV\_lab\_2). Here, we  
1328 compared the performance of these methods using all the combinations used for their parameters  
1329 (Supplementary Table 1).

1330

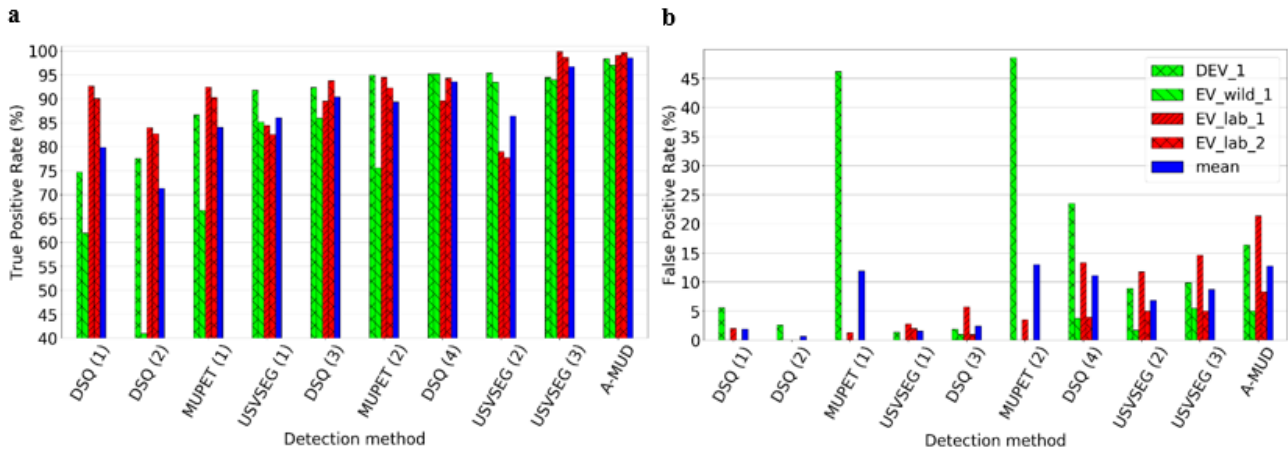

1331

1332

1333

1334

1335

1336

1337

1338

1339

1340

1341

1342

1343

1344

1345

1346

**Supplementary Figure 3. a) true positive rate (TPR) and b) false positive rate (FPR) of detection tools.** If we want to compare the best performance of each detection tool with the best performance of others, A-MUD and with a slight difference, USVSEG are in the first and second places, followed by DSQ and MUPET. But if we do not consider the best performance of each tool (obtained using optimal parameters), this ranking will be different. In this case, A-MUD is the best tool, and DSQ (3) with the TPR of 90% and the FPR of 2.4% is superior to the other two methods. As a result, the type of parameter selected for each tool affects the superiority of their performance in the USV detection compared to others.

## 4.2. Classification

In the model design section, we used various approaches to deal with the problem of the imbalanced datasets, including using original, down-sampled, bootstrapped, and over-sampled data. The following figure presents the over-sampled data by Synthetic Minority Oversampling Technique Edited Nearest Neighbor (SMOTEENN) presented.

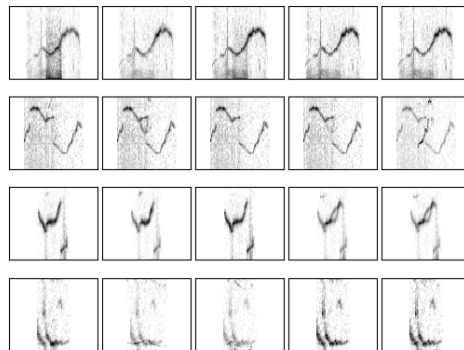

1347

1348

1349

1350

1351

1352

1353

1354

1355

1356

**Supplementary Figure 4. Samples produced by SMOTEENN (Batista et al., 2004).** The first column from the left is the original instance and the next columns are the resampled samples. The first, second, third, and last rows are from the classes 'c', 'c3', 'c2', and 'h', respectively. The images produced by the SMOTEENN are very similar to the original data, so, compared to the original data, this method did not help to improve the classifier performance.

## 4.3. Interobserver reliability (IOR)

In the main text of paper, we presented IOR values for various combination of classes in DEV and EV datasets. The following figures shows the normalized confusion matrix based on the labels assigned by two observers.

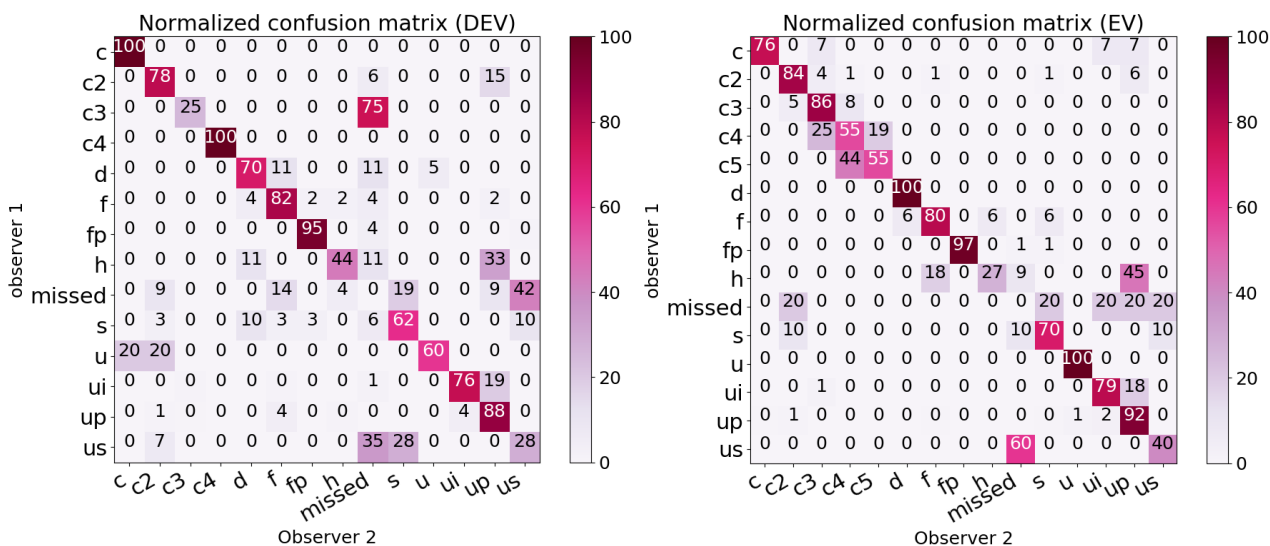

1357  
1358  
1359  
1360  
1361  
1362  
1363

**Supplementary Figure 5. Agreement between two observers for two subsets of model development (DEV, left) and evaluation (EV, right) data.** ‘missed’ segments are elements that are manually detected by only one observer. Both figures show high disagreement between the observers for both data in the ‘us’ and ‘h’ classes. In more detail, the amount of reliability in the DEV data in ‘c3’ and ‘u’ classes is very low. Differently, in the EV data, the reliability is less than other classes in ‘c4’ and ‘c5’ classes.

1364  
1365

The table below shows the number of samples in each class in the data examined for IOR calculation.

1366  
1367  
1368  
1369  
1370

**Supplementary Table 3. Number of samples of each class of the observer 1 in DEV and EV subsets for IOR calculation.** In DEV sub-dataset (n=5 soundfiles), there are very few samples (i.e., 2, 4, or 6) from the classes ‘c’ and ‘c4’, ‘c3’ and classes ‘u’ and ‘h’ (i.e., 6 or 10), thus the results of these classes are not very reliable. We found similar results in the EV sub-dataset (n=5 sound files) where there are very few samples from the classes ‘us’, ‘d’, ‘c’, and ‘c5’.

| Dataset | c  | C2 | C3 | C4 | C5 | d  | F  | fp  | h  | missed | s  | u  | ui  | up  | us |
|---------|----|----|----|----|----|----|----|-----|----|--------|----|----|-----|-----|----|
| DEV     | 2  | 34 | 4  | 2  | 0  | 17 | 41 | 121 | 9  | 21     | 29 | 5  | 113 | 219 | 14 |
| EV      | 13 | 64 | 79 | 36 | 9  | 8  | 15 | 75  | 11 | 5      | 10 | 14 | 53  | 181 | 5  |

1371  
1372  
1373  
1374  
1375

#### 4.5. Comparing *BootSnap* and DSQ: sensitivity to new classes

As mentioned in the results section (Section 3.7), the performance of a model is important when dealing with a new class. Because there was no sample of the ‘c4’ and ‘c5’ classes in the DEV data, we compared the output of the *BootSnap* and DSQ methods when the two classes were in the EV data. The following figure shows example of members of these two classes in EV\_wild data.

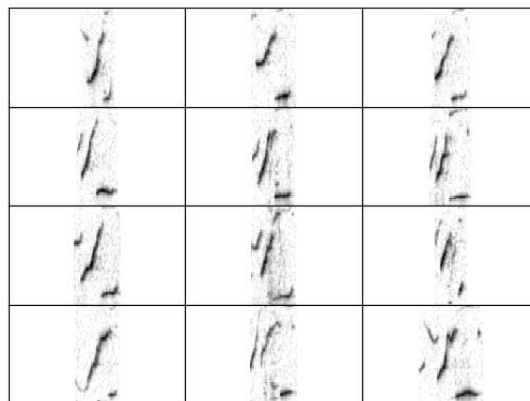

1376  
1377  
1378  
1379  
1380  
1381

**Supplementary Figure 6. Samples of USVs from the classes ‘c4’ and ‘c5’, USVs with 4 and 5 jumps, respectively.** *BootSnap* assigned 68% and 32% of the total members of these two classes to the 2 and 3-jump included USVs, respectively. DSQ assigned the members of the classes ‘c4’ and ‘c5’ mostly to the 2 and 3-jump included USVs and ‘ui’. Although the class ‘ui’ might be relatively similar to the ‘c4’ and ‘c5’ classes based on visual inspection, there is no jump in this class.
